# Supplementary material for: Modulating the properties of buckybowls containing multiple heteroatoms
Source: Royal Society of Chemistry journal article supplement (doi:10.1039/d0qo01452d), 2020-12-14
Supplement: d0qo01452d1.pdf [file d0qo01452d1.pdf]

## Table of Contents

|                                                                    |            |
|--------------------------------------------------------------------|------------|
| <b>1. General remarks.....</b>                                     | <b>S2</b>  |
| <b>2. Experimental section.....</b>                                | <b>S2</b>  |
| <b>3. NMR spectra.....</b>                                         | <b>S5</b>  |
| <b>4. Mass spectra.....</b>                                        | <b>S8</b>  |
| <b>5. X-ray crystallographic structures.....</b>                   | <b>S10</b> |
| <b>6. Fluorescence decay curves .....</b>                          | <b>S15</b> |
| <b>7. Association behavior of 6 and 7 with C<sub>60</sub>.....</b> | <b>S17</b> |
| <b>8. Theoretical calculation.....</b>                             | <b>S19</b> |
| <b>9. References.....</b>                                          | <b>S41</b> |

## 1. General remarks

All reagents and solvents were commercially available and were used without further purification unless otherwise noted. For thin layer chromatography Silica gel 60 F254 plates from Merck were used and examined under UV-light irradiation (254 nm and 365 nm). Flash column chromatography was performed on silica gel (particle size: 200-300 mesh). Melting points were measured with a MPA100 OptiMelt. IR-Spectra were recorded as KBr-pellets on a Bruker VERTEX 80V spectrometer. NMR spectra were taken on Bruker AVANCE NEO (400 MHz). Chemical shifts ( $\delta$ ) are reported in parts per million (ppm) relative to traces of C<sub>6</sub>H<sub>6</sub> in the deuterated solvent. HRMS experiments were carried out on a ThermoFisher LTQ Orbitrap XL. Absorption spectra were recorded on a Shimadzu UV2600. Emission spectra, absolute quantum yields, as well as fluorescence lifetimes were measured on FluoroMax-4 spectrometer equipped with an integral sphere and a time-correlated single photon counting system with a NanoLED laser. Crystal structure analysis was accomplished with SuperNova Dual AtlasS2 diffractometer with a Cu source. Electrochemical data were obtained in dichloromethane solution of tetrabutylammonium hexafluorophosphate (0.1 M) with ferrocene as an internal standard. Cyclic voltammograms (CV) was obtained using a glassy carbon working electrode, a platinum counter electrode, and a silver wire reference electrode tested on CHI660E station. EPR spectrum was measured on a Bruker EMX 10/12 apparatus. 1,9-dibromo-3,7-di-*tert*-butylphenothiazine **4** was synthesized according to the reported method.<sup>[S1]</sup>

## 2. Experimental section

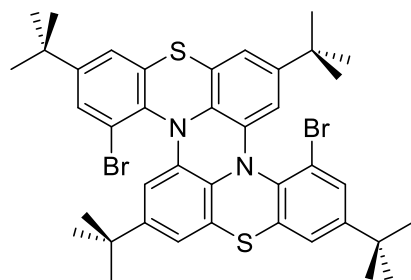

A 38 mL screw capped glass vial was charged with 1,9-dibromo-3,7-di-*tert*-butylphenothiazine **4** (1.88 g, 4 mmol), CuI (152 mg, 0.8 mmol), 18-crown-6 (211 mg, 0.8 mmol) and anhydrous K<sub>2</sub>CO<sub>3</sub> (830 mg, 6 mmol). Under the protection of argon, dry *o*-dichlorobenzene (6 mL) was added to the vial and the mixture was bubbled with argon for 3 minutes. The vial was quickly sealed and heated at 180 °C for 2 days. After cooling down to room temperature, the reaction mixture was diluted with dichloromethane (150 mL) and washed with water (200 mL) and dried over Na<sub>2</sub>SO<sub>4</sub>. The solvent was removed by rotatory evaporation and the crude product was purified by silica gel column chromatography (dichloromethane/petroleum ether 1:50) to give the product **5** as pale yellow solid (1.18 g, 76%). m.p. 338-339 °C; <sup>1</sup>H NMR (400 MHz, benzene-*d*<sub>6</sub>)  $\delta$  (ppm) = 7.52 (d, *J* = 2.1 Hz, 2H), 7.26 (d, *J* = 2.1 Hz, 2H), 7.00 (d, *J* = 1.8 Hz, 2H), 6.93 (d, *J* = 1.7 Hz, 2H), 1.06 (s, 18H), 0.99 (s, 18H); <sup>13</sup>C NMR (100 MHz,

benzene-*d*<sub>6</sub>)  $\delta$  (ppm) = 149.4, 148.4, 137.9, 135.4, 134.7, 132.4, 130.8, 125.2, 124.5, 118.3, 115.2, 114.6, 34.5, 34.3, 31.2, 31.0; IR (KBr)  $\tilde{\nu}$  (cm<sup>-1</sup>) = 3070, 2960, 2910, 2869, 1620, 1575, 1475, 1448, 1408, 1329, 1261, 1221, 1122, 1020, 866, 739, 694, 624, 603, 472; HRMS(ESI) (*m/z*) : [M]<sup>+</sup> calcd. for C<sub>40</sub>H<sub>44</sub>Br<sub>2</sub>N<sub>2</sub>S<sub>2</sub>, 776.1292; found, 776.1312.

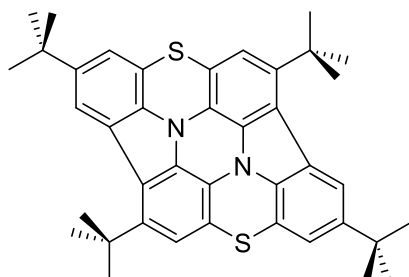

A 38 mL screw capped glass vial was charged with compound **5** (466 mg, 0.60 mmol), Pd(OAc)<sub>2</sub> (27 mg, 0.12 mmol) and anhydrous K<sub>2</sub>CO<sub>3</sub> (498 g, 3.6 mmol). Under the protection of argon, dry *N,N*-dimethylacetamide (2.4 mL) and PCy<sub>3</sub>HBF<sub>4</sub> (88 mg, 0.24 mmol) were added to the vial and the mixture was bubbled with argon for 3 minutes. The vial was quickly sealed and heated at 170 °C for 48 hours. After cooling down to room temperature, the reaction mixture was diluted with dichloromethane (150 mL) and washed with water (200 mL) and dried over Na<sub>2</sub>SO<sub>4</sub>. The solvent was removed by rotatory evaporation and the crude product was purified by silica gel column chromatography (dichloromethane/petroleum ether 1:50) to give the product **6** as yellow solid (181 mg, 49%). m.p. > 400 °C (dec.); <sup>1</sup>H NMR (400 MHz, benzene-*d*<sub>6</sub>)  $\delta$  (ppm) = 7.85 (d, *J* = 1.1 Hz, 2H), 7.07 (d, *J* = 1.1 Hz, 2H), 6.73 (s, 2H), 1.45 (s, 18H), 1.28 (s, 18H); <sup>13</sup>C NMR (100 MHz, benzene-*d*<sub>6</sub>)  $\delta$  (ppm) = 147.2, 145.6, 134.4, 132.0, 124.6, 121.2, 120.6, 120.5, 119.8, 117.1, 116.1, 110.6, 35.6, 35.4, 32.0, 29.8; IR (KBr)  $\tilde{\nu}$  (cm<sup>-1</sup>) = 2956, 2914, 2867, 1620, 1548, 1510, 1475, 1365, 1309, 1271, 1183, 11143, 1109, 1055, 926, 858, 729, 627, 606, 519, 472; HRMS(ESI) (*m/z*) : [M]<sup>+</sup> calcd. for C<sub>40</sub>H<sub>42</sub>N<sub>2</sub>S<sub>2</sub>, 614.2789; found, 614.2811.

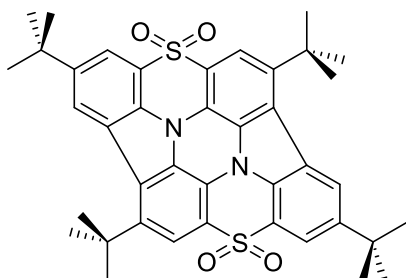

A 100 mL single neck flask was charged with compound **6** (87 mg, 0.14 mmol), chloroform (8 mL), acetic acid (8 mL) and hydrogen peroxide aqueous solution (30%, 0.30 mL, 2.94 mmol). The reaction mixture was stirred at 60 °C for 12 hours. After cooling down to room temperature, the reaction mixture was diluted with dichloromethane (150 mL) and washed with water (2 x 200 mL) and dried over Na<sub>2</sub>SO<sub>4</sub>. The solvent was removed by rotatory evaporation and the crude product was purified by silica gel column chromatography (dichloromethane/petroleum ether 2:1) to give the product **7** as yellow solid (67 mg, 70%). m.p. > 400 °C (dec.); <sup>1</sup>H NMR (400 MHz, benzene-*d*<sub>6</sub>)  $\delta$  (ppm) = 8.58 (d, *J* = 1.2 Hz, 2H), 8.25 (d, *J* = 1.2 Hz, 2H), 7.75 (s, 2H), 1.67 (s, 18H), 1.51 (s, 18H); <sup>13</sup>C NMR (100 MHz, benzene-*d*<sub>6</sub>)  $\delta$  (ppm) = 148.4, 147.4,

134.5, 130.6, 128.7, 126.1, 124.7, 124.3, 121.8, 121.0, 119.4, 113.9, 36.2, 36.1, 31.9, 29.4; IR (KBr)  $\tilde{\nu}$  (cm<sup>-1</sup>) = 3072, 2960, 2875, 1624, 1493, 1396, 1367, 1315, 1138, 887, 822, 777, 748, 706, 658, 615, 571, 544, 492; HRMS(ESI) (*m/z*) : [M]<sup>+</sup> calcd. for C<sub>40</sub>H<sub>42</sub>N<sub>2</sub>S<sub>2</sub>, 678.2586; found, 678.2610.

#### **Chemical oxidation of 6 with AgSbF<sub>6</sub>**

Compound **6** (31 mg, 0.05 mmol) was dissolved in dry dichloromethane (10 mL) and AgSbF<sub>6</sub> (18 mg, 0.05 mmol) was quickly added in solution. The reaction was stirred at room temperature for 20 minutes. The solution was then passed through a PTFE filter to remove the Ag powder. After removal of the solvent by rotatory evaporation, the obtained powder was washed with hexane to give the monocation **6**<sup>+</sup>SbF<sub>6</sub><sup>-</sup> (33 mg, 77%).

Compound **6** (31 mg, 0.05 mmol) was dissolved in dry dichloromethane (10 mL) and AgSbF<sub>6</sub> (36 mg, 0.1 mmol) was quickly added in solution. The reaction was stirred at room temperature for 20 minutes. The solution was then passed through a PTFE filter to remove the Ag powder. After removal of the solvent by rotatory evaporation, the obtained powder was washed with hexane to give the dication **6**<sup>2+</sup>[SbF<sub>6</sub>]<sup>2-</sup> (52 mg, 96%).

### 3. NMR Spectra

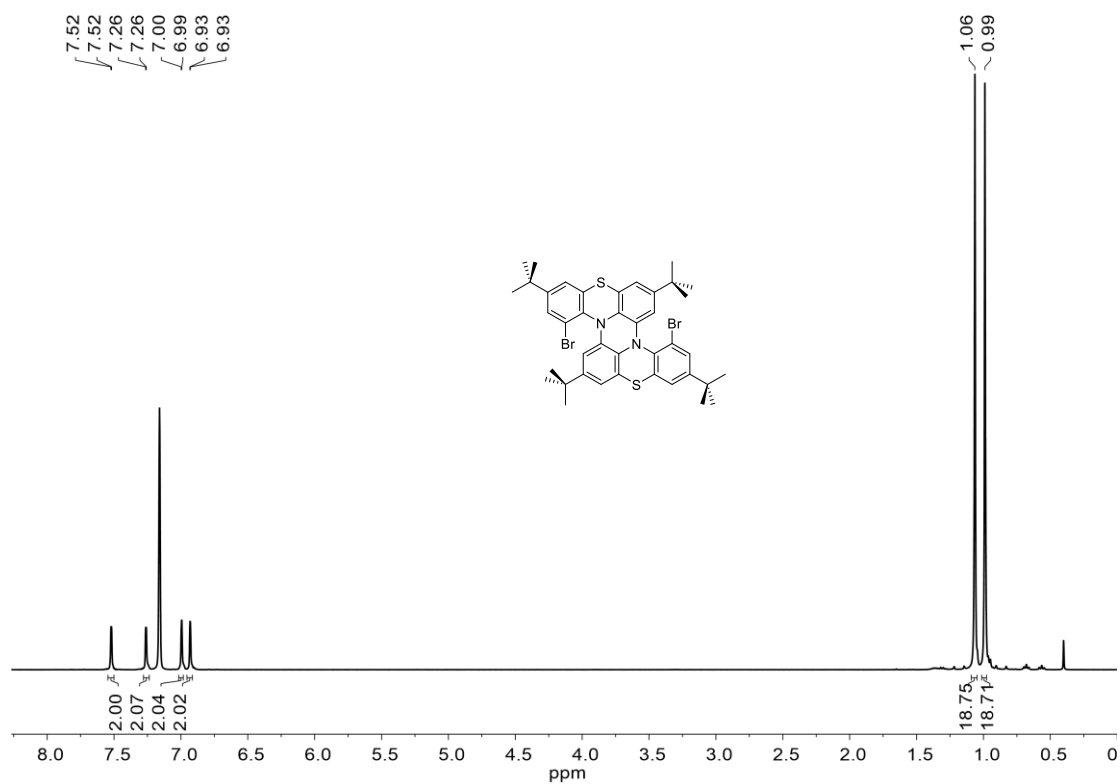

Figure S1. <sup>1</sup>H NMR spectrum (400 MHz, C<sub>6</sub>D<sub>6</sub>) of compound 5.

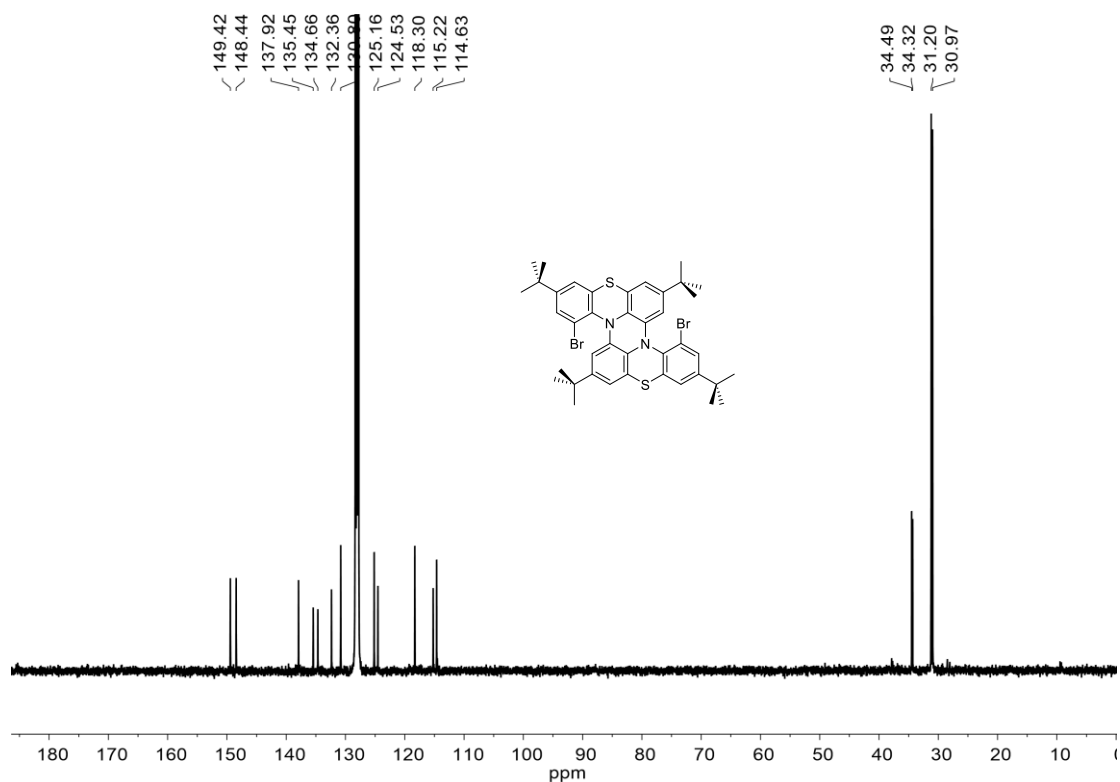

Figure S2. <sup>13</sup>C NMR spectrum (100 MHz, C<sub>6</sub>D<sub>6</sub>) of compound 5.

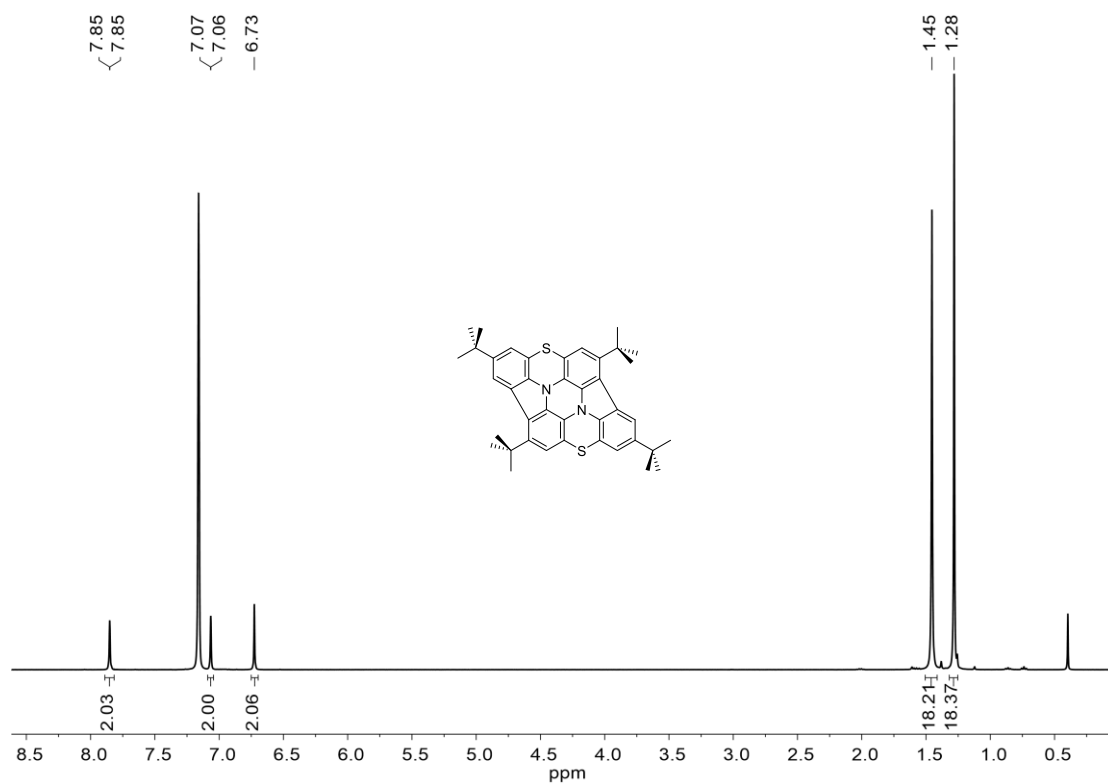

**Figure S3.**  $^1\text{H}$  NMR spectrum (400 MHz,  $\text{C}_6\text{D}_6$ ) of compound **6**.

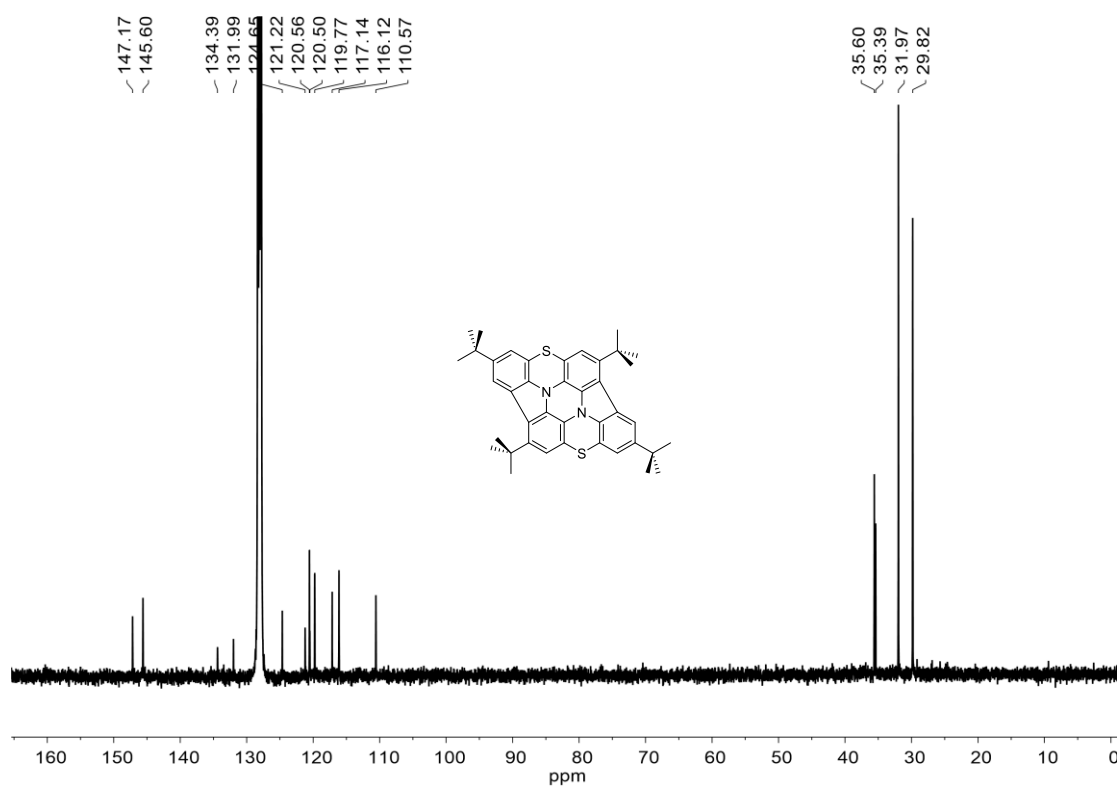

**Figure S4.**  $^{13}\text{C}$  NMR spectrum (100 MHz,  $\text{C}_6\text{D}_6$ ) of compound **6**.

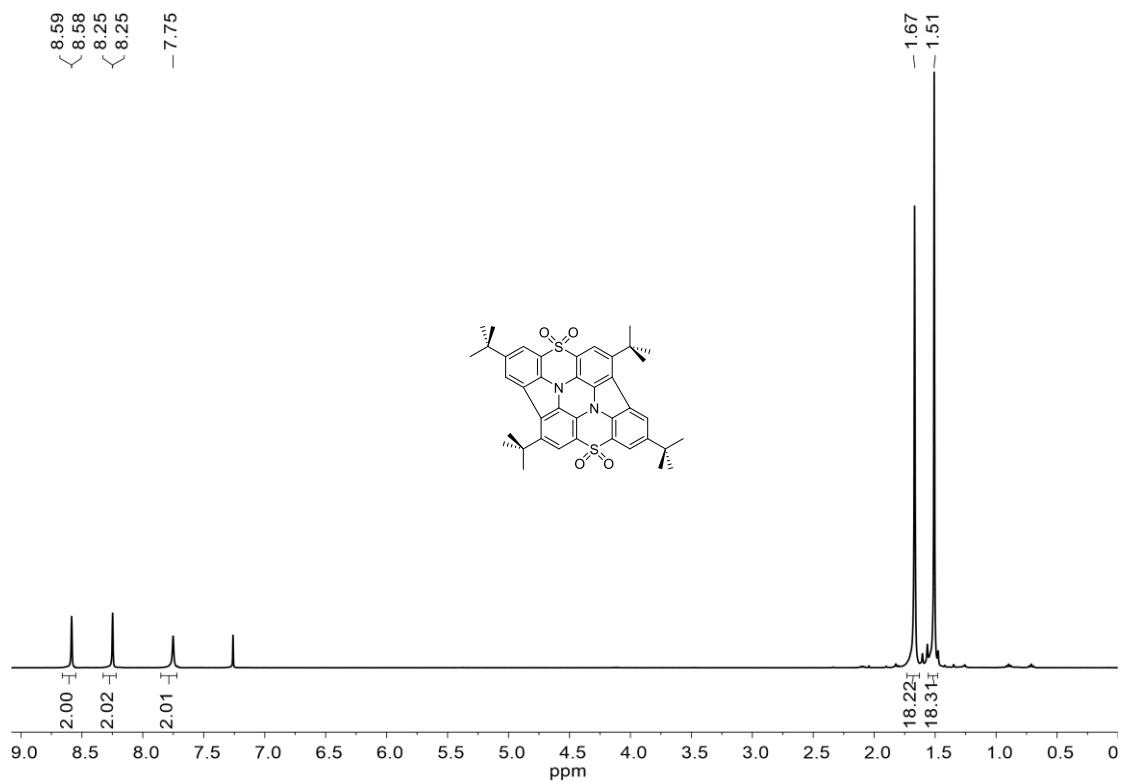

**Figure S5.** <sup>1</sup>H NMR spectrum (400 MHz, C<sub>6</sub>D<sub>6</sub>) of compound 7.

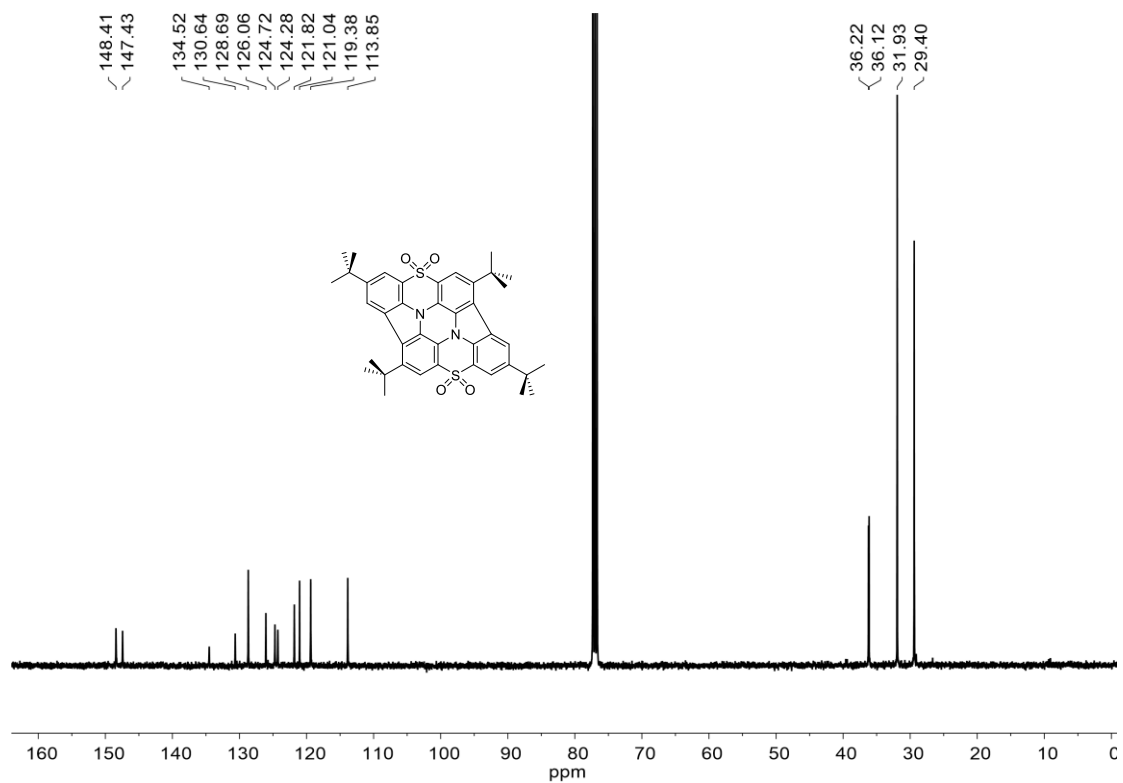

**Figure S6.** <sup>13</sup>C NMR spectrum (100 MHz, C<sub>6</sub>D<sub>6</sub>) of compound 7.

## 4. Mass Spectra

0609-138 #22-36 RT: 0.17-0.28 AV: 15 NL: 8.06E6  
T: FTMS + p ESI Full ms [300.00-1600.00]

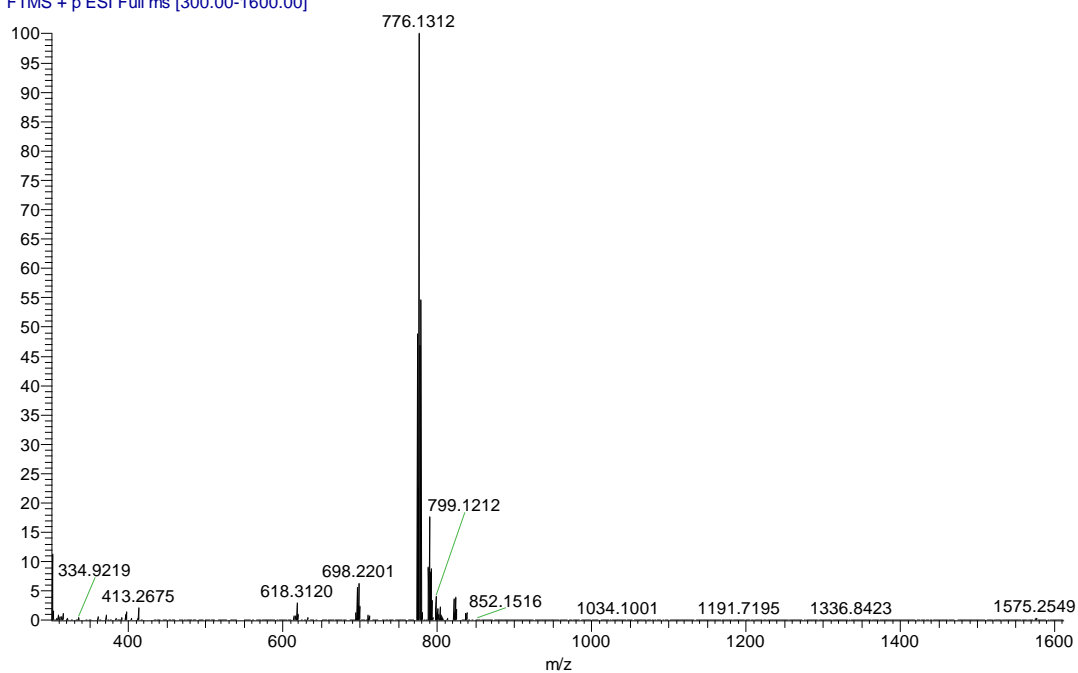

Figure S7. Mass spectrum (ESI) of compound 5.

0609-139 #23-33 RT: 0.17-0.25 AV: 11 NL: 2.27E6  
T: FTMS + p ESI Full ms [300.00-1600.00]

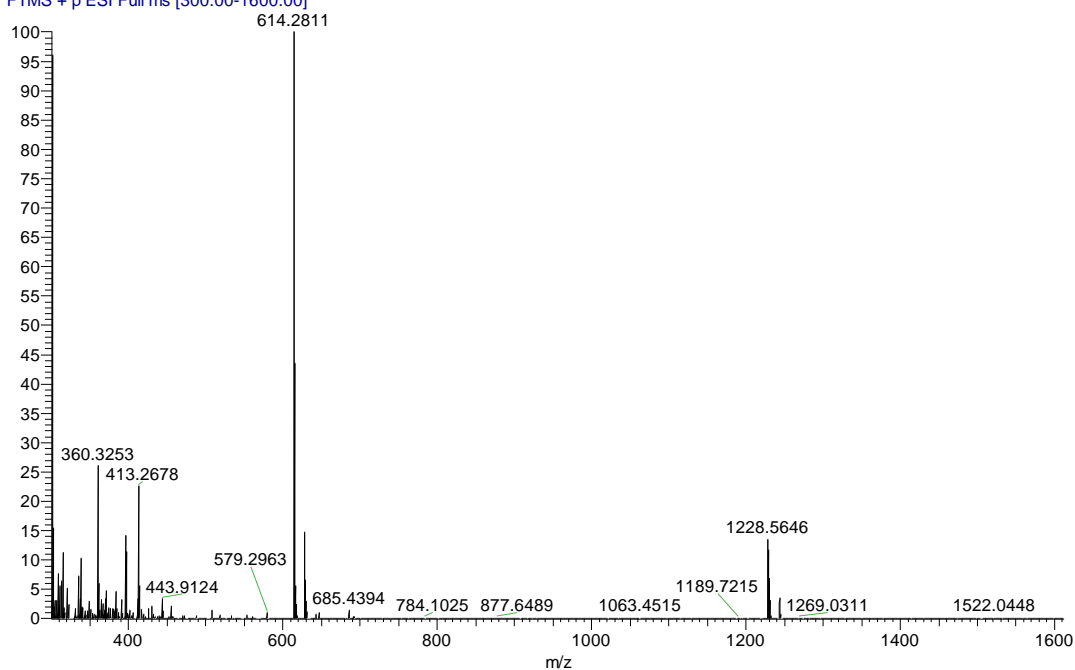

Figure S8. Mass spectrum (ESI) of compound 6.



0609-140 #23-32 RT: 0.17-0.25 AV: 10 NL: 2.29E6  
T: FTMS + p ESI Full ms [300.00-1600.00]

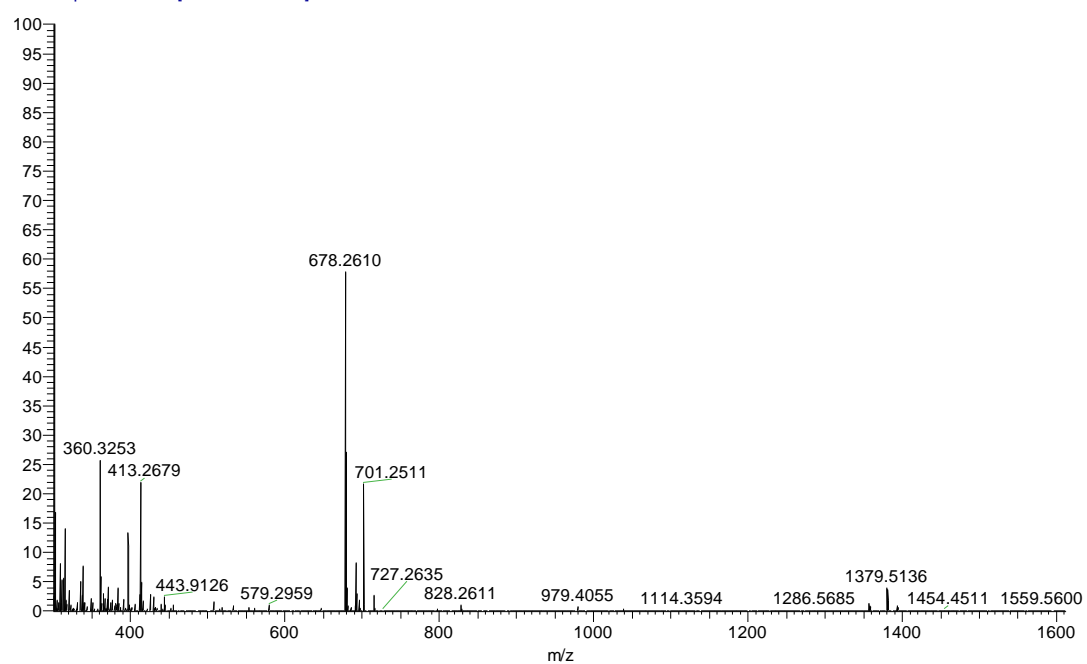

**Figure S9.** Mass spectrum (ESI) of compound 7.

## 5. X-ray crystallographic structures

**Table S1** Crystal data and structure refinement for **6** (CCDC 2024841).

|                                             |                                                               |
|---------------------------------------------|---------------------------------------------------------------|
| Empirical formula                           | C <sub>40</sub> H <sub>42</sub> N <sub>2</sub> S <sub>2</sub> |
| Formula weight                              | 614.87                                                        |
| Temperature/K                               | 293(2)                                                        |
| Crystal system                              | tetragonal                                                    |
| Space group                                 | P4 <sub>3</sub> 2 <sub>1</sub> 2                              |
| a/Å                                         | 17.7483(2)                                                    |
| b/Å                                         | 17.7483(2)                                                    |
| c/Å                                         | 12.1031(2)                                                    |
| α/°                                         | 90                                                            |
| β/°                                         | 90                                                            |
| γ/°                                         | 90                                                            |
| Volume/Å <sup>3</sup>                       | 3812.50(11)                                                   |
| Z                                           | 4                                                             |
| ρ <sub>calc</sub> /cm <sup>3</sup>          | 1.071                                                         |
| μ/mm <sup>-1</sup>                          | 1.459                                                         |
| F(000)                                      | 1312.0                                                        |
| Crystal size/mm <sup>3</sup>                | 0.14 × 0.12 × 0.1                                             |
| Radiation                                   | Cu Kα (λ = 1.54184)                                           |
| 2θ range for data collection/°              | 7.044 to 147.034                                              |
| Index ranges                                | -19 ≤ h ≤ 21, -21 ≤ k ≤ 14, -14 ≤ l ≤ 10                      |
| Reflections collected                       | 7563                                                          |
| Independent reflections                     | 3735 [R <sub>int</sub> = 0.0216, R <sub>sigma</sub> = 0.0290] |
| Data/restraints/parameters                  | 3735/0/206                                                    |
| Goodness-of-fit on F <sup>2</sup>           | 1.041                                                         |
| Final R indexes [I ≥ 2σ (I)]                | R <sub>1</sub> = 0.0379, wR <sub>2</sub> = 0.1035             |
| Final R indexes [all data]                  | R <sub>1</sub> = 0.0400, wR <sub>2</sub> = 0.1053             |
| Largest diff. peak/hole / e Å <sup>-3</sup> | 0.23/-0.21                                                    |
| Flack parameter                             | 0.017(9)                                                      |

**Table S2** Crystal data and structure refinement for **6-C<sub>60</sub>** (CCDC 2024844).

---

|                                             |                                                                |
|---------------------------------------------|----------------------------------------------------------------|
| Empirical formula                           | C <sub>77</sub> H <sub>50</sub> N <sub>2</sub> S <sub>2</sub>  |
| Formula weight                              | 1067.31                                                        |
| Temperature/K                               | 100.00(10)                                                     |
| Crystal system                              | triclinic                                                      |
| Space group                                 | P-1                                                            |
| a/Å                                         | 13.2343(7)                                                     |
| b/Å                                         | 13.6338(5)                                                     |
| c/Å                                         | 16.3052(6)                                                     |
| α/°                                         | 75.744(3)                                                      |
| β/°                                         | 69.165(4)                                                      |
| γ/°                                         | 89.458(3)                                                      |
| Volume/Å <sup>3</sup>                       | 2655.0(2)                                                      |
| Z                                           | 2                                                              |
| ρ <sub>calc</sub> /cm <sup>3</sup>          | 1.335                                                          |
| μ/mm <sup>-1</sup>                          | 1.299                                                          |
| F(000)                                      | 1116.0                                                         |
| Crystal size/mm <sup>3</sup>                | 0.14 × 0.12 × 0.11                                             |
| Radiation                                   | Cu Kα (λ = 1.54184)                                            |
| 2θ range for data collection/°              | 6.006 to 147.296                                               |
| Index ranges                                | -15 ≤ h ≤ 16, -14 ≤ k ≤ 16, -20 ≤ l ≤ 18                       |
| Reflections collected                       | 19135                                                          |
| Independent reflections                     | 10392 [R <sub>int</sub> = 0.0469, R <sub>sigma</sub> = 0.0605] |
| Data/restraints/parameters                  | 10392/7/765                                                    |
| Goodness-of-fit on F <sup>2</sup>           | 1.081                                                          |
| Final R indexes [I ≥ 2σ (I)]                | R <sub>1</sub> = 0.0552, wR <sub>2</sub> = 0.1440              |
| Final R indexes [all data]                  | R <sub>1</sub> = 0.0635, wR <sub>2</sub> = 0.1529              |
| Largest diff. peak/hole / e Å <sup>-3</sup> | 0.84/-0.85                                                     |

---

**Table S3** Crystal data and structure refinement for **6<sup>+</sup>** SbF<sub>6</sub><sup>-</sup> (CCDC 2024842).

|                                             |                                                                                                 |
|---------------------------------------------|-------------------------------------------------------------------------------------------------|
| Empirical formula                           | C <sub>41</sub> H <sub>44</sub> Cl <sub>2</sub> F <sub>6</sub> N <sub>2</sub> S <sub>2</sub> Sb |
| Formula weight                              | 935.55                                                                                          |
| Temperature/K                               | 100.01(10)                                                                                      |
| Crystal system                              | triclinic                                                                                       |
| Space group                                 | P-1                                                                                             |
| a/Å                                         | 11.2189(5)                                                                                      |
| b/Å                                         | 12.4989(4)                                                                                      |
| c/Å                                         | 15.4497(6)                                                                                      |
| α/°                                         | 103.886(3)                                                                                      |
| β/°                                         | 92.811(4)                                                                                       |
| γ/°                                         | 102.498(3)                                                                                      |
| Volume/Å <sup>3</sup>                       | 2041.57(15)                                                                                     |
| Z                                           | 2                                                                                               |
| ρ <sub>calc</sub> /cm <sup>3</sup>          | 1.522                                                                                           |
| μ/mm <sup>-1</sup>                          | 8.030                                                                                           |
| F(000)                                      | 950.0                                                                                           |
| Crystal size/mm <sup>3</sup>                | 0.14 × 0.12 × 0.1                                                                               |
| Radiation                                   | Cu Kα (λ = 1.54184)                                                                             |
| 2θ range for data collection/°              | 5.926 to 147.476                                                                                |
| Index ranges                                | -11 ≤ h ≤ 13, -15 ≤ k ≤ 14, -19 ≤ l ≤ 18                                                        |
| Reflections collected                       | 14048                                                                                           |
| Independent reflections                     | 7985 [R <sub>int</sub> = 0.0625, R <sub>sigma</sub> = 0.0741]                                   |
| Data/restraints/parameters                  | 7985/0/499                                                                                      |
| Goodness-of-fit on F <sup>2</sup>           | 1.061                                                                                           |
| Final R indexes [I ≥ 2σ (I)]                | R <sub>1</sub> = 0.0759, wR <sub>2</sub> = 0.2103                                               |
| Final R indexes [all data]                  | R <sub>1</sub> = 0.0899, wR <sub>2</sub> = 0.2221                                               |
| Largest diff. peak/hole / e Å <sup>-3</sup> | 1.87/-1.75                                                                                      |

**Table S4** Crystal data and structure refinement for  $6^{2+} [\text{SbF}_6^-]_2$  (CCDC 2024843).

|                                                |                                                                                     |
|------------------------------------------------|-------------------------------------------------------------------------------------|
| Empirical formula                              | $\text{C}_{42}\text{H}_{46}\text{Cl}_4\text{F}_{12}\text{N}_2\text{S}_2\text{Sb}_2$ |
| Formula weight                                 | 1256.23                                                                             |
| Temperature/K                                  | 100.01(10)                                                                          |
| Crystal system                                 | triclinic                                                                           |
| Space group                                    | P-1                                                                                 |
| a/Å                                            | 9.3204(5)                                                                           |
| b/Å                                            | 10.4195(5)                                                                          |
| c/Å                                            | 14.2747(6)                                                                          |
| $\alpha/^\circ$                                | 100.389(4)                                                                          |
| $\beta/^\circ$                                 | 104.598(4)                                                                          |
| $\gamma/^\circ$                                | 111.290(5)                                                                          |
| Volume/Å <sup>3</sup>                          | 1191.81(11)                                                                         |
| Z                                              | 1                                                                                   |
| $\rho_{\text{calc}}/\text{cm}^3$               | 1.750                                                                               |
| $\mu/\text{mm}^{-1}$                           | 12.588                                                                              |
| F(000)                                         | 622.0                                                                               |
| Crystal size/mm <sup>3</sup>                   | 0.11 × 0.09 × 0.08                                                                  |
| Radiation                                      | Cu K $\alpha$ ( $\lambda = 1.54184$ )                                               |
| 2 $\Theta$ range for data collection/ $^\circ$ | 6.71 to 147.416                                                                     |
| Index ranges                                   | -10 ≤ h ≤ 11, -12 ≤ k ≤ 12, -17 ≤ l ≤ 10                                            |
| Reflections collected                          | 7952                                                                                |
| Independent reflections                        | 4644 [ $R_{\text{int}} = 0.0344$ , $R_{\text{sigma}} = 0.0476$ ]                    |
| Data/restraints/parameters                     | 4644/0/295                                                                          |
| Goodness-of-fit on F <sup>2</sup>              | 1.046                                                                               |
| Final R indexes [ $I \geq 2\sigma(I)$ ]        | $R_1 = 0.0343$ , $wR_2 = 0.0850$                                                    |
| Final R indexes [all data]                     | $R_1 = 0.0367$ , $wR_2 = 0.0868$                                                    |
| Largest diff. peak/hole / e Å <sup>-3</sup>    | 0.80/-1.28                                                                          |

**Table S5** Crystal data and structure refinement for **7** (CCDC 2036398).

|                                             |                                                                              |
|---------------------------------------------|------------------------------------------------------------------------------|
| Empirical formula                           | C <sub>47</sub> H <sub>50</sub> N <sub>2</sub> O <sub>4</sub> S <sub>2</sub> |
| Formula weight                              | 771.01                                                                       |
| Temperature/K                               | 100.01(10)                                                                   |
| Crystal system                              | triclinic                                                                    |
| Space group                                 | P-1                                                                          |
| a/Å                                         | 11.0384(6)                                                                   |
| b/Å                                         | 14.0757(7)                                                                   |
| c/Å                                         | 14.1533(8)                                                                   |
| α/°                                         | 100.408(4)                                                                   |
| β/°                                         | 103.832(5)                                                                   |
| γ/°                                         | 105.597(4)                                                                   |
| Volume/Å <sup>3</sup>                       | 1984.86(19)                                                                  |
| Z                                           | 2                                                                            |
| ρ <sub>calc</sub> /cm <sup>3</sup>          | 1.290                                                                        |
| μ/mm <sup>-1</sup>                          | 0.182                                                                        |
| F(000)                                      | 820.0                                                                        |
| Crystal size/mm <sup>3</sup>                | 0.14 × 0.13 × 0.12                                                           |
| Radiation                                   | Mo Kα (λ = 0.71073)                                                          |
| 2θ range for data collection/°              | 4.02 to 49.998                                                               |
| Index ranges                                | -13 ≤ h ≤ 13, -16 ≤ k ≤ 16, -15 ≤ l ≤ 16                                     |
| Reflections collected                       | 14009                                                                        |
| Independent reflections                     | 6992 [R <sub>int</sub> = 0.0322, R <sub>sigma</sub> = 0.0540]                |
| Data/restraints/parameters                  | 6992/0/509                                                                   |
| Goodness-of-fit on F <sup>2</sup>           | 1.032                                                                        |
| Final R indexes [I >= 2σ (I)]               | R <sub>1</sub> = 0.0459, wR <sub>2</sub> = 0.1068                            |
| Final R indexes [all data]                  | R <sub>1</sub> = 0.0576, wR <sub>2</sub> = 0.1172                            |
| Largest diff. peak/hole / e Å <sup>-3</sup> | 0.32/-0.37                                                                   |

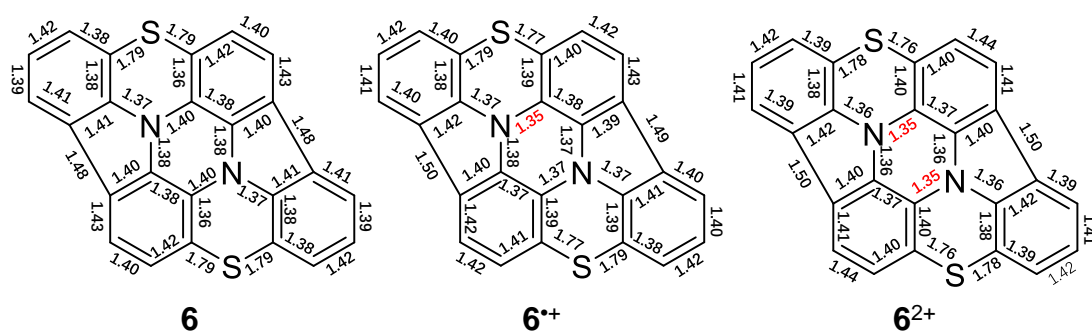**Figure S10.** Bond lengths of crystal structures of buckybowl **6** in different oxidative state.

## 6. Fluorescence decay curves

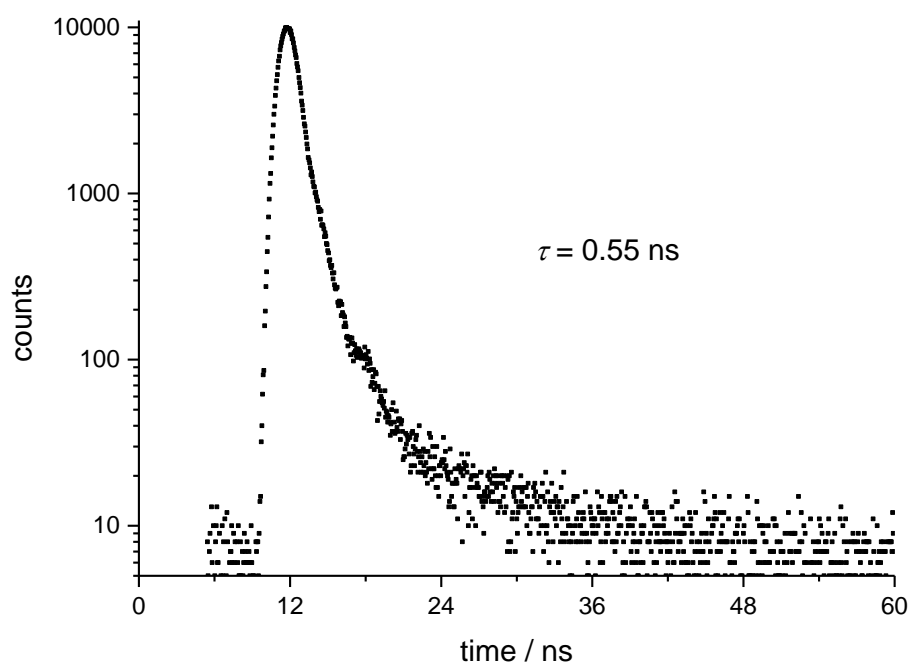

**Figure S11.** Fluorescence decay curve of **6** in dichloromethane at room temperature.

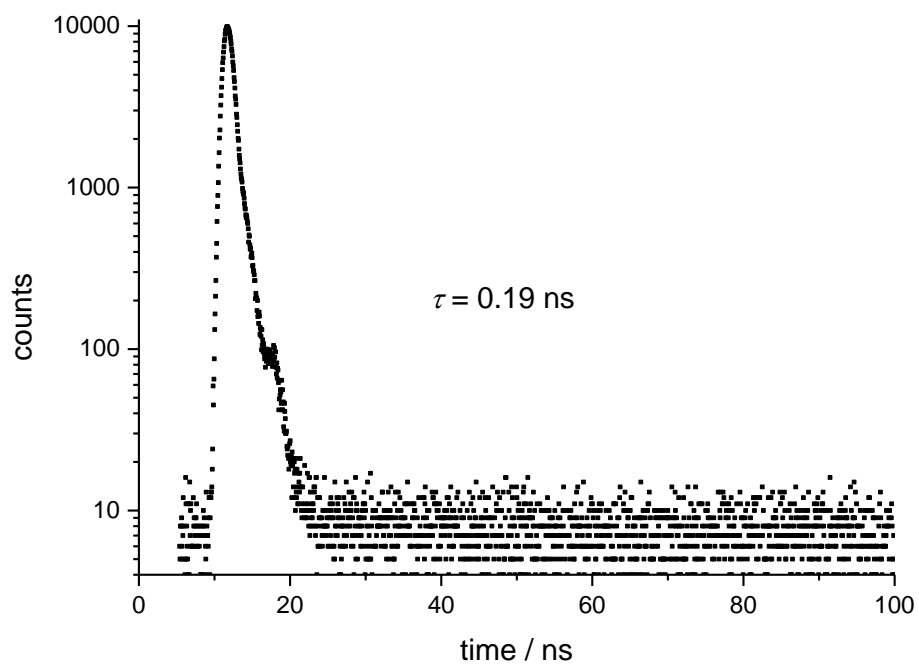

**Figure S12.** Fluorescence decay curve of **6** in solid state at room temperature.

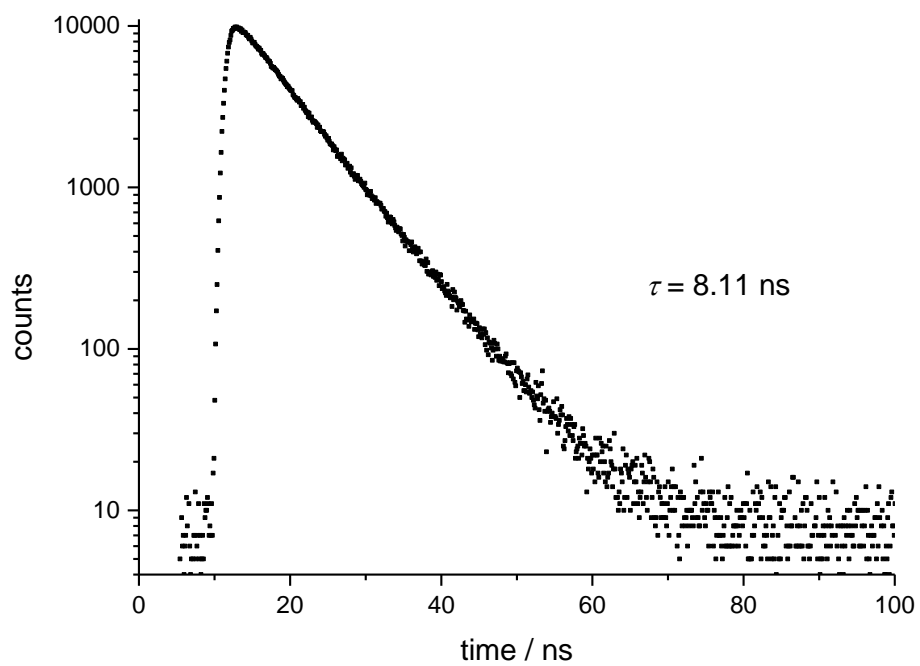

**Figure S13.** Fluorescence decay curve of 7 in dichloromethane at room temperature.

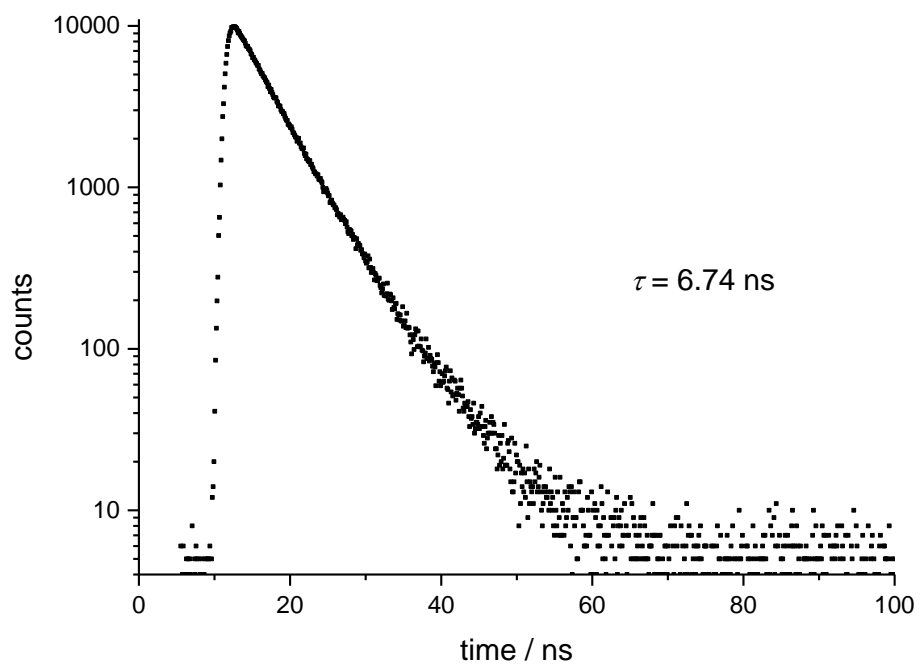

**Figure S14.** Fluorescence decay curve of 7 in solid state at room temperature.



## 7. Association behavior of 6 and 7 with C<sub>60</sub>

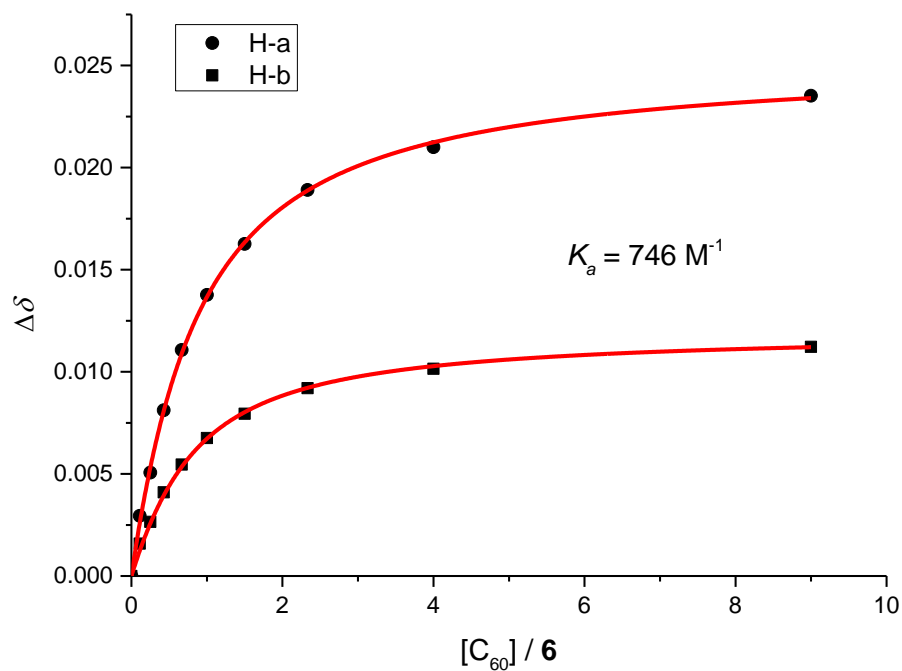

Figure S15. The binding isotherms and average binding constant of 6 and C<sub>60</sub>.

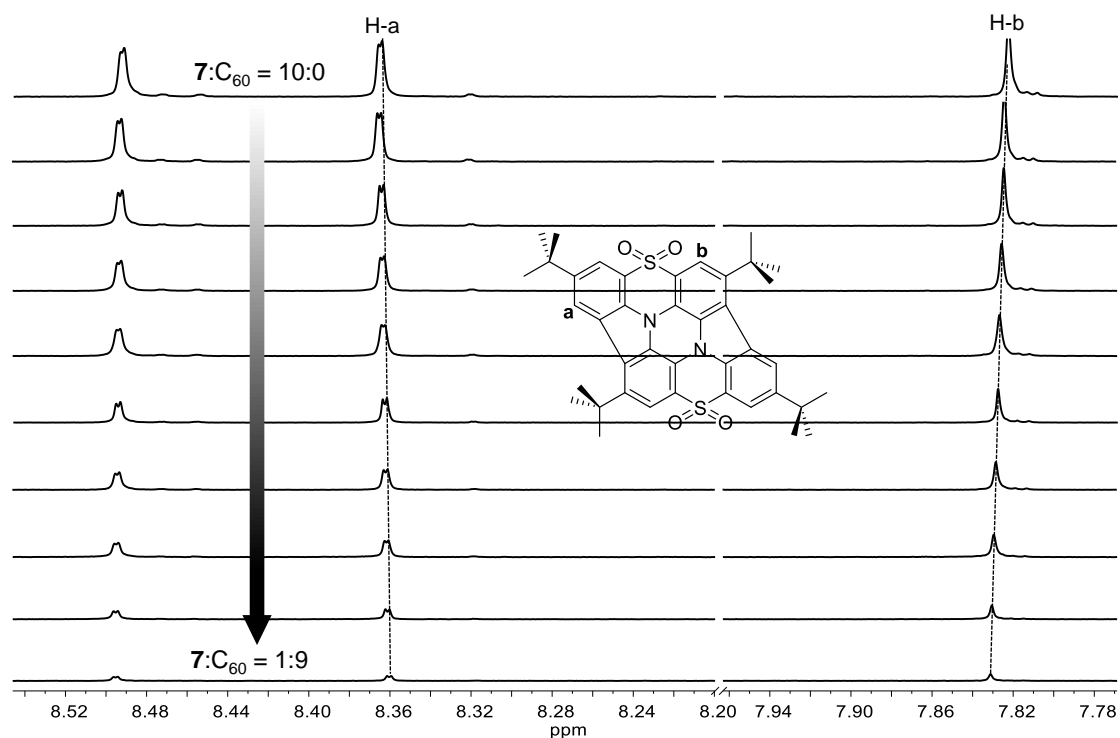

Figure S16. <sup>1</sup>H NMR spectra (400 MHz) of 7 when titrated with C<sub>60</sub> ( $[7] + [C_{60}] = 1.8 \times 10^{-3} \text{ M}$ , toluene-*d*<sub>8</sub>, 298 K).

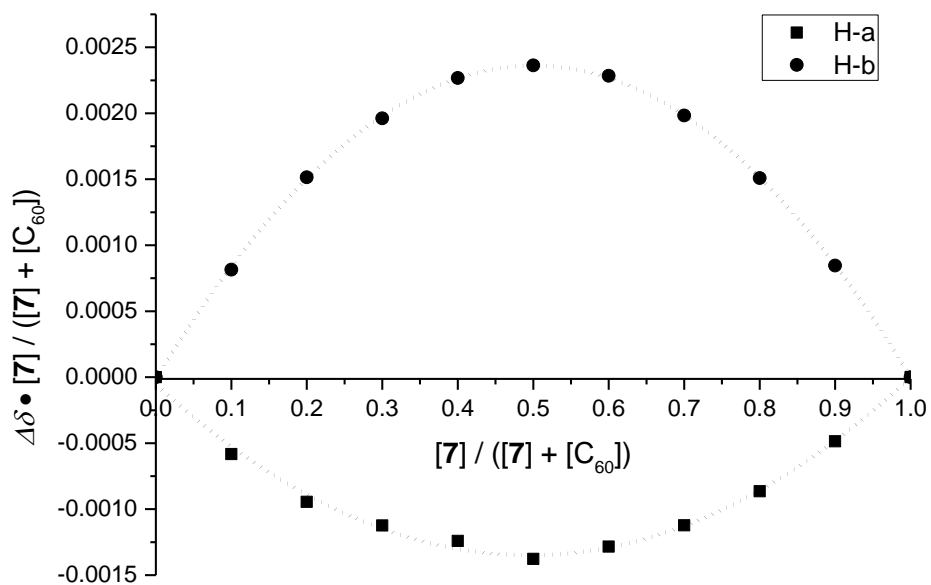

**Figure S17.** Job plot based on  $^1\text{H}$  NMR titration of **7** with  $C_{60}$  in toluene- $d_8$ .

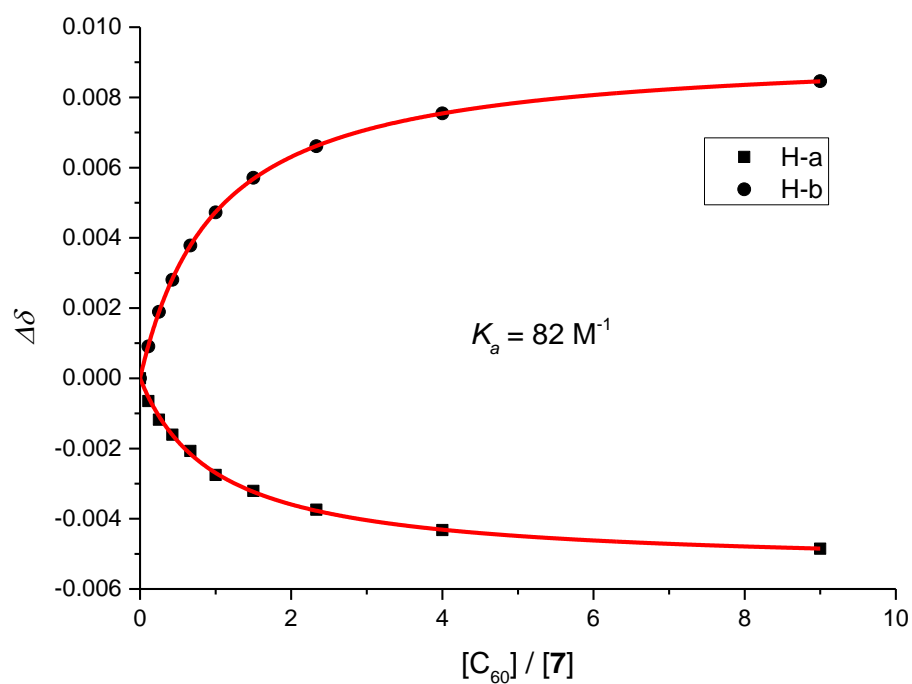

**Figure S18.** The binding isotherms and average binding constant of **7** and  $C_{60}$ .

## 8. Theoretical calculation

All the theoretical calculations were carried out using a *Gaussian 16* software.<sup>[S2]</sup> All the calculations were based on the optimized geometries at B3LYP/6-31G(d,p) level of theory. The bowl-to-bowl inversion energy was calculated at B3LYP/6-311+G(2d,p) level of theory for the single-point energy, the planar transition state was checked by frequency calculations at B3LYP/6-31G(d,p) level of theory.<sup>[S3]</sup> The frontier molecular orbitals are calculated at the B3LYP/6-311+G(d,p) level of theory. The nucleus-independent chemical shift (NICS) calculation was done at GIAO-B3LYP/6-311+G(d,p) level of theory. Bq atoms were inserted at the calculated positions and the Bq positions that are at the 1 Å away above and below the bowls were fixed with the assistant of Multiwfn software, as well as the calculated NICS values at the *zz* tensor.<sup>[S4]</sup> The calculations of excited state properties were performed using time-dependend DFT methods at (U)B3LYP/6-311+G(d,p) level of theory in the solvent dichloromethane.

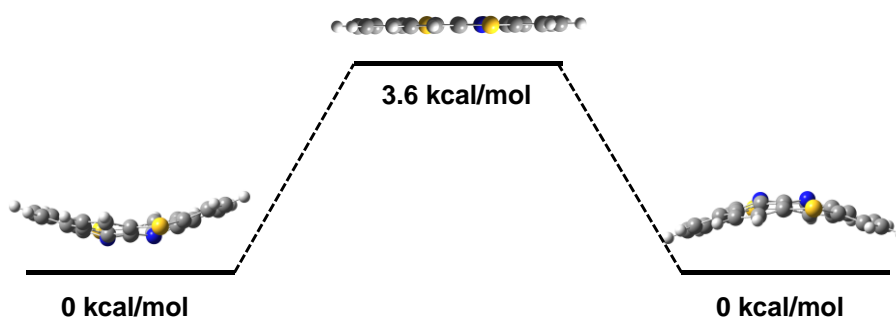

**Figure S19.** Energy diagram of the inversion process of the non-substituted **6**.

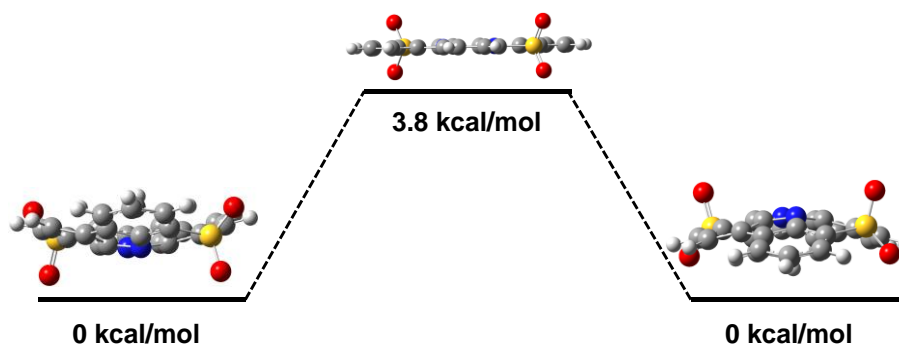

**Figure S20.** Energy diagram of the inversion process of the non-substituted **7**.

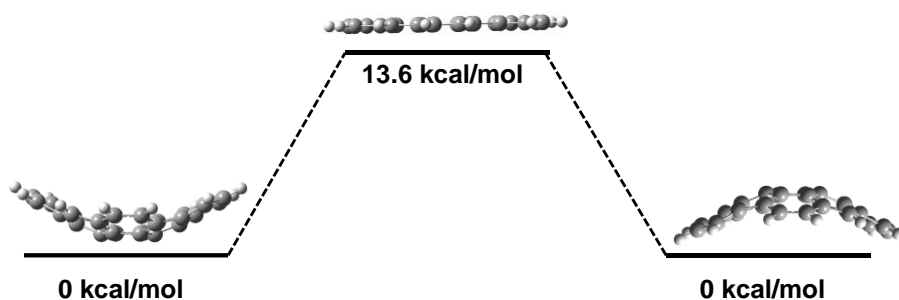

**Figure S21.** Energy diagram of the inversion process of buckybowl **1**.

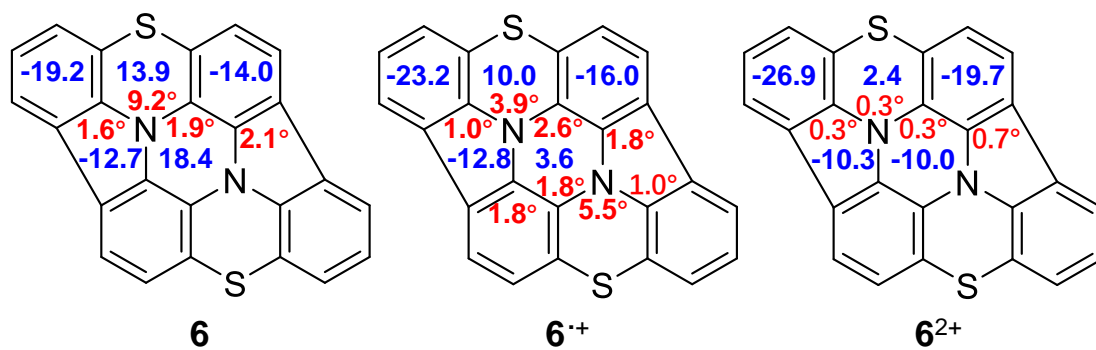

**Figure S22.** Average NICS(1)<sub>zz</sub> values and POAV angles of the non-substituted **6** in different oxidative state. The POAV angles are calculated based on the crystal structures.

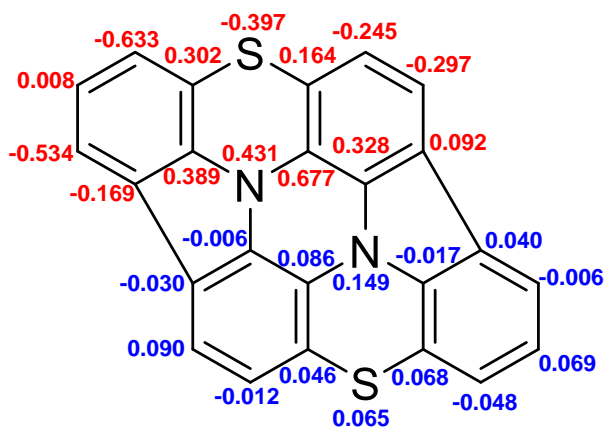

**Figure S23.** Calculated Mulliken atom charge (red) and spin density (blue) of **6<sup>+</sup>** at UB3LYP/6-311+G(d,p) level of theory. *tert*-Butyl groups are omitted for clarity.

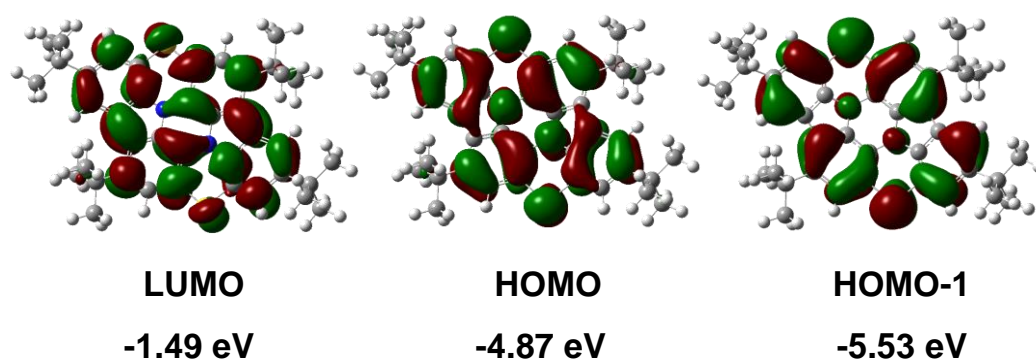

**Figure S24.** Calculated frontier molecular orbitals and energy levels of **6** at B3LYP/6-311+G(d,p) level of theory.

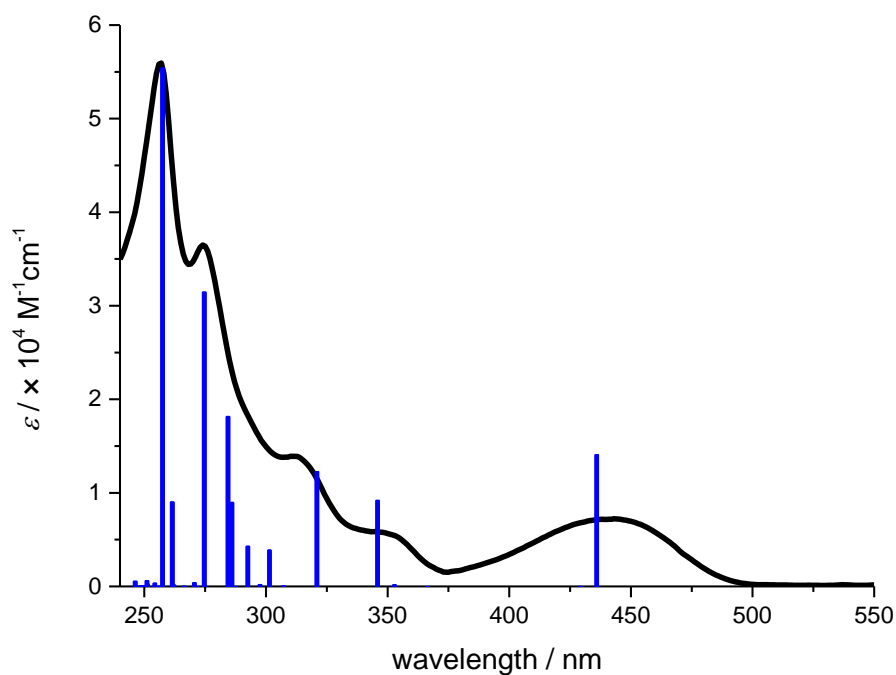

**Figure S25.** UV/Vis absorption spectrum of **6** and TD-DFT calculated oscillator strength (blue column) in dichloromethane at B3LYP/6-311+G(d,p) level.

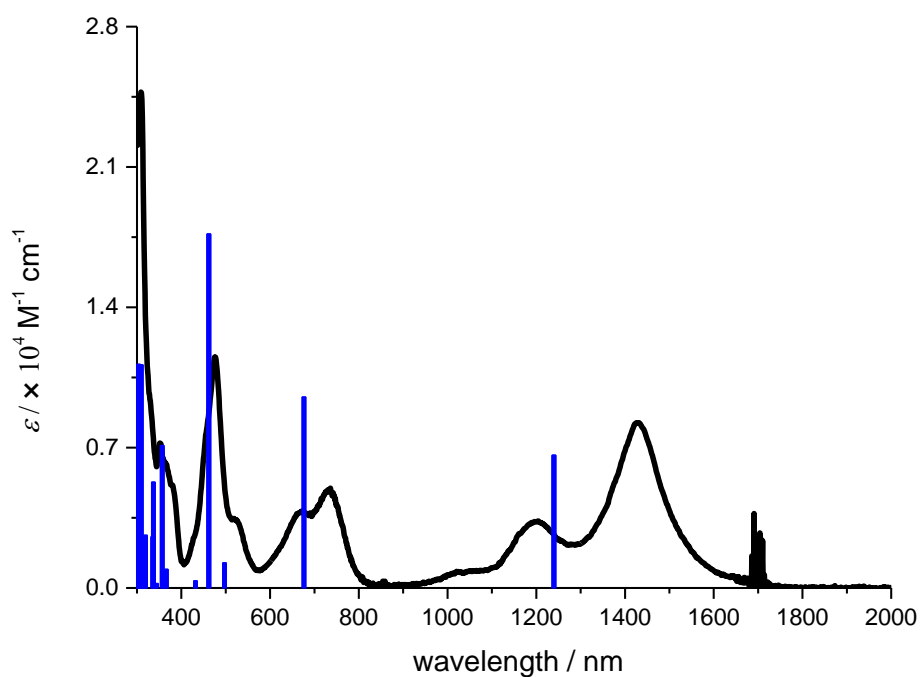

**Figure S26.** UV/Vis absorption spectrum of **6<sup>+</sup>** and TD-DFT calculated oscillator strength (blue column) in dichloromethane at UB3LYP/6-311+G(d,p) level.

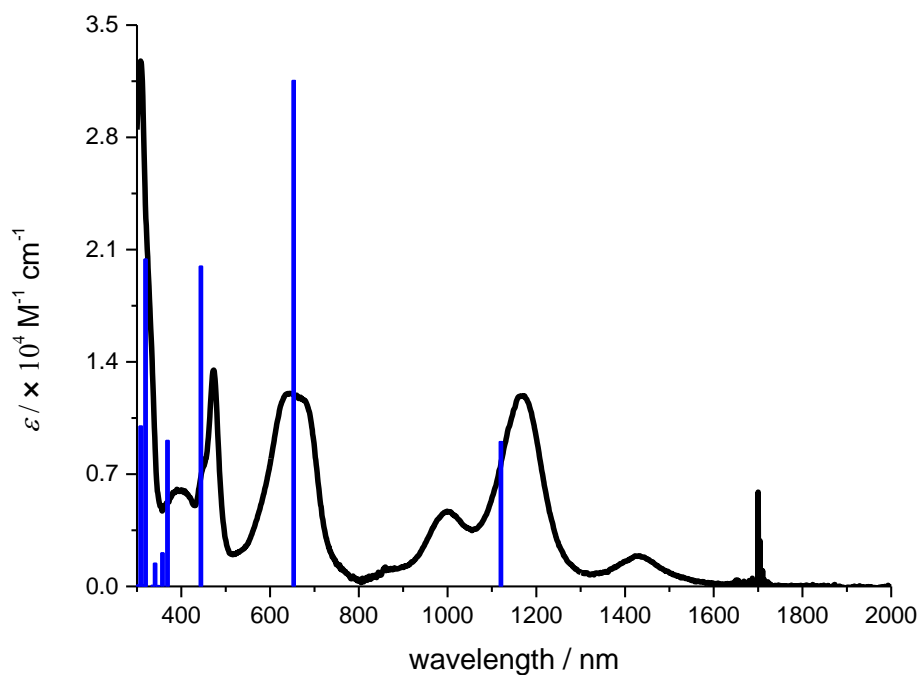

**Figure S27.** UV/Vis absorption spectrum of  $6^{2+}$  and TD-DFT calculated oscillator strength (blue column) in dichloromethane at UB3LYP/6-311+G(d,p) level.

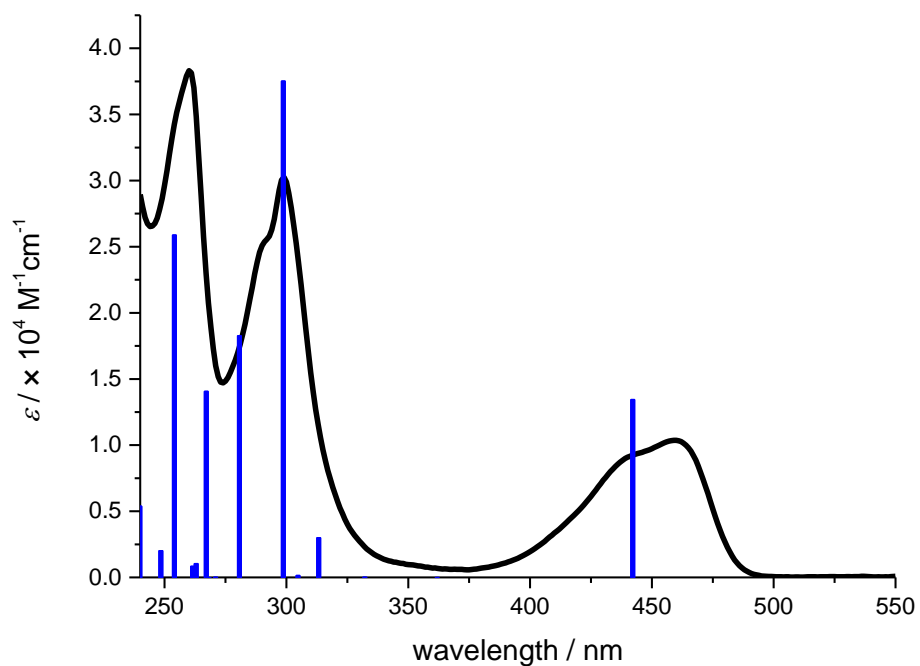

**Figure S28.** UV/Vis absorption spectrum of **7** and TD-DFT calculated oscillator strength (blue column) in dichloromethane at B3LYP/6-311+G(d,p) level.

**Table S6.** TD-DFT calculated first-ten electron transitions of **6** in dichloromethane at B3LYP / 6-311+G(d,p) level

---

|                             |           |           |          |              |
|-----------------------------|-----------|-----------|----------|--------------|
| Excited State 1: Singlet-A  | 2.8422 eV | 436.22 nm | f=0.2117 | <S**2>=0.000 |
| 164 -> 165                  | 0.69545   |           |          |              |
| Excited State 2: Singlet-A  | 2.8862 eV | 429.58 nm | f=0.0006 | <S**2>=0.000 |
| 164 -> 166                  | 0.70164   |           |          |              |
| Excited State 3: Singlet-A  | 3.3808 eV | 366.73 nm | f=0.0002 | <S**2>=0.000 |
| 163 -> 165                  | 0.22708   |           |          |              |
| 164 -> 167                  | 0.66435   |           |          |              |
| Excited State 4: Singlet-A  | 3.5114 eV | 353.09 nm | f=0.0034 | <S**2>=0.000 |
| 163 -> 165                  | 0.65594   |           |          |              |
| 164 -> 167                  | -0.22978  |           |          |              |
| Excited State 5: Singlet-A  | 3.5817 eV | 346.16 nm | f=0.1384 | <S**2>=0.000 |
| 163 -> 166                  | 0.62673   |           |          |              |
| 164 -> 168                  | 0.30010   |           |          |              |
| Excited State 6: Singlet-A  | 3.8597 eV | 321.23 nm | f=0.1845 | <S**2>=0.000 |
| 162 -> 165                  | 0.10926   |           |          |              |
| 163 -> 166                  | -0.30020  |           |          |              |
| 164 -> 168                  | 0.61966   |           |          |              |
| Excited State 7: Singlet-A  | 4.0310 eV | 307.58 nm | f=0.0015 | <S**2>=0.000 |
| 161 -> 165                  | -0.18699  |           |          |              |
| 162 -> 166                  | 0.20549   |           |          |              |
| 163 -> 168                  | -0.11197  |           |          |              |
| 164 -> 169                  | 0.62484   |           |          |              |
| Excited State 8: Singlet-A  | 4.1093 eV | 301.72 nm | f=0.0589 | <S**2>=0.000 |
| 161 -> 166                  | -0.11399  |           |          |              |
| 162 -> 165                  | 0.40224   |           |          |              |
| 163 -> 167                  | 0.37945   |           |          |              |
| 164 -> 171                  | 0.27866   |           |          |              |
| 164 -> 172                  | 0.27264   |           |          |              |
| Excited State 9: Singlet-A  | 4.1627 eV | 297.84 nm | f=0.0036 | <S**2>=0.000 |
| 161 -> 165                  | 0.10587   |           |          |              |
| 162 -> 166                  | -0.21311  |           |          |              |
| 164 -> 170                  | 0.62640   |           |          |              |
| 164 -> 175                  | -0.17949  |           |          |              |
| Excited State 10: Singlet-A | 4.2156 eV | 294.11 nm | f=0.0000 | <S**2>=0.000 |
| 161 -> 165                  | -0.15882  |           |          |              |
| 162 -> 166                  | 0.56480   |           |          |              |
| 163 -> 168                  | 0.17367   |           |          |              |
| 164 -> 169                  | -0.20432  |           |          |              |
| 164 -> 170                  | 0.23837   |           |          |              |

---

164: HOMO, 165: LUMO

**Table S7.** TD-DFT calculated first-ten electron transitions of **6<sup>++</sup>** in dichloromethane at UB3LYP / 6-311+G(d,p) level

|                           |           |            |          |              |
|---------------------------|-----------|------------|----------|--------------|
| Excited State 1: 2.017-A  | 0.9991 eV | 1240.92 nm | f=0.0945 | <S**2>=0.767 |
| 163B -> 164B              | 0.98957   |            |          |              |
| Excited State 2: 2.038-A  | 1.8167 eV | 682.48 nm  | f=0.0000 | <S**2>=0.788 |
| 160B -> 164B              | 0.24886   |            |          |              |
| 161B -> 164B              | 0.95865   |            |          |              |
| Excited State 3: 2.032-A  | 1.8293 eV | 677.77 nm  | f=0.1360 | <S**2>=0.783 |
| 162B -> 164B              | 0.98061   |            |          |              |
| Excited State 4: 2.057-A  | 2.2083 eV | 561.46 nm  | f=0.0000 | <S**2>=0.808 |
| 164A -> 166A              | -0.19484  |            |          |              |
| 160B -> 164B              | 0.93383   |            |          |              |
| 161B -> 164B              | -0.25606  |            |          |              |
| Excited State 5: 2.086-A  | 2.4867 eV | 498.59 nm  | f=0.0179 | <S**2>=0.837 |
| 163A -> 166A              | 0.10409   |            |          |              |
| 164A -> 165A              | 0.85819   |            |          |              |
| 159B -> 164B              | 0.45299   |            |          |              |
| Excited State 6: 2.109-A  | 2.5713 eV | 482.19 nm  | f=0.0000 | <S**2>=0.862 |
| 164A -> 166A              | 0.93850   |            |          |              |
| 164A -> 167A              | -0.11832  |            |          |              |
| 160B -> 164B              | 0.21095   |            |          |              |
| Excited State 7: 2.064-A  | 2.6763 eV | 463.27 nm  | f=0.2521 | <S**2>=0.815 |
| 164A -> 165A              | -0.41324  |            |          |              |
| 159B -> 164B              | 0.87158   |            |          |              |
| Excited State 8: 2.337-A  | 2.7673 eV | 448.04 nm  | f=0.0000 | <S**2>=1.116 |
| 163A -> 165A              | -0.31376  |            |          |              |
| 158B -> 164B              | 0.89028   |            |          |              |
| 163B -> 165B              | 0.24115   |            |          |              |
| Excited State 9: 3.329-A  | 2.8616 eV | 433.27 nm  | f=0.0050 | <S**2>=2.520 |
| 160A -> 165A              | -0.14159  |            |          |              |
| 163A -> 166A              | -0.58094  |            |          |              |
| 163A -> 167A              | -0.10521  |            |          |              |
| 164A -> 165A              | 0.20288   |            |          |              |
| 164A -> 168A              | 0.23558   |            |          |              |
| 160B -> 165B              | 0.12672   |            |          |              |
| 160B -> 168B              | 0.10674   |            |          |              |
| 163B -> 166B              | 0.63406   |            |          |              |
| 163B -> 167B              | -0.12034  |            |          |              |
| Excited State 10: 2.928-A | 2.8988 eV | 427.71 nm  | f=0.0000 | <S**2>=1.893 |
| 160A -> 166A              | -0.11870  |            |          |              |
| 163A -> 165A              | -0.44472  |            |          |              |
| 164A -> 166A              | 0.13492   |            |          |              |
| 164A -> 167A              | 0.50814   |            |          |              |
| 158B -> 164B              | -0.36833  |            |          |              |



|              |          |
|--------------|----------|
| 160B -> 166B | 0.14932  |
| 162B -> 165B | -0.10769 |
| 163B -> 165B | 0.48431  |
| 163B -> 168B | 0.11282  |

164: HOMO, 165: LUMO

**Table S8.** TD-DFT calculated first-ten electron transitions of  $6^{2+}$  in dichloromethane at UB3LYP / 6-311+G(d,p) level

|                          |           |            |          |              |
|--------------------------|-----------|------------|----------|--------------|
| Excited State 1: 3.000-A | 0.3750 eV | 3306.21 nm | f=0.0000 | <S**2>=2.000 |
| 163A -> 164A             | -0.75591  |            |          |              |
| 163B -> 164B             | 0.75591   |            |          |              |
| 163A <- 164A             | -0.27449  |            |          |              |
| 163B <- 164B             | 0.27449   |            |          |              |
| Excited State 2: 1.000-A | 1.1043 eV | 1122.74 nm | f=0.1160 | <S**2>=0.000 |
| 162A -> 164A             | -0.15659  |            |          |              |
| 163A -> 164A             | 0.69493   |            |          |              |
| 162B -> 164B             | -0.15659  |            |          |              |
| 163B -> 164B             | 0.69493   |            |          |              |
| 163A <- 164A             | -0.11298  |            |          |              |
| 163B <- 164B             | -0.11298  |            |          |              |
| Excited State 3: 3.000-A | 1.4024 eV | 884.10 nm  | f=0.0000 | <S**2>=2.000 |
| 162A -> 164A             | -0.70285  |            |          |              |
| 162B -> 164B             | 0.70285   |            |          |              |
| Excited State 4: 3.000-A | 1.4715 eV | 842.59 nm  | f=0.0000 | <S**2>=2.000 |
| 160A -> 164A             | -0.10508  |            |          |              |
| 161A -> 164A             | 0.69590   |            |          |              |
| 160B -> 164B             | 0.10508   |            |          |              |
| 161B -> 164B             | -0.69590  |            |          |              |
| Excited State 5: 3.000-A | 1.8830 eV | 658.46 nm  | f=0.0000 | <S**2>=2.000 |
| 160A -> 164A             | -0.68649  |            |          |              |
| 161A -> 164A             | -0.11007  |            |          |              |
| 160B -> 164B             | 0.68649   |            |          |              |
| 161B -> 164B             | 0.11007   |            |          |              |
| Excited State 6: 1.000-A | 1.8904 eV | 655.88 nm  | f=0.4053 | <S**2>=0.000 |
| 162A -> 164A             | 0.68402   |            |          |              |
| 163A -> 164A             | 0.16186   |            |          |              |
| 162B -> 164B             | 0.68402   |            |          |              |
| 163B -> 164B             | 0.16186   |            |          |              |
| Excited State 7: 1.000-A | 1.9325 eV | 641.56 nm  | f=0.0000 | <S**2>=0.000 |
| 160A -> 164A             | -0.35662  |            |          |              |
| 161A -> 164A             | 0.60731   |            |          |              |
| 160B -> 164B             | -0.35662  |            |          |              |

|                           |           |           |          |              |  |
|---------------------------|-----------|-----------|----------|--------------|--|
| 161B -> 164B              | 0.60731   |           |          |              |  |
| Excited State 8: 1.000-A  | 2.1765 eV | 569.66 nm | f=0.0000 | <S**2>=0.000 |  |
| 160A -> 164A              | 0.60864   |           |          |              |  |
| 161A -> 164A              | 0.35711   |           |          |              |  |
| 160B -> 164B              | 0.60864   |           |          |              |  |
| 161B -> 164B              | 0.35711   |           |          |              |  |
| Excited State 9: 3.000-A  | 2.1927 eV | 565.44 nm | f=0.0000 | <S**2>=2.000 |  |
| 158A -> 164A              | 0.69872   |           |          |              |  |
| 158B -> 164B              | -0.69872  |           |          |              |  |
| Excited State 10: 3.000-A | 2.3137 eV | 535.88 nm | f=0.0000 | <S**2>=2.000 |  |
| 159A -> 164A              | 0.68191   |           |          |              |  |
| 163A -> 165A              | 0.12505   |           |          |              |  |
| 159B -> 164B              | -0.68191  |           |          |              |  |
| 163B -> 165B              | -0.12505  |           |          |              |  |

164: HOMO, 165: LUMO

**Table S9.** TD-DFT calculated first-ten electron transitions of **7** in dichloromethane at B3LYP / 6-311+G(d,p) level

|                            |           |           |          |              |  |
|----------------------------|-----------|-----------|----------|--------------|--|
| Excited State 1: Singlet-A | 2.8040 eV | 442.17 nm | f=0.2536 | <S**2>=0.000 |  |
| 180 -> 181                 | 0.70063   |           |          |              |  |
| Excited State 2: Singlet-A | 3.4258 eV | 361.92 nm | f=0.0004 | <S**2>=0.000 |  |
| 180 -> 182                 | 0.69947   |           |          |              |  |
| Excited State 3: Singlet-A | 3.7318 eV | 332.24 nm | f=0.0008 | <S**2>=0.000 |  |
| 177 -> 181                 | 0.10278   |           |          |              |  |
| 179 -> 181                 | 0.68248   |           |          |              |  |
| 180 -> 183                 | 0.10005   |           |          |              |  |
| Excited State 4: Singlet-A | 3.8291 eV | 323.79 nm | f=0.0000 | <S**2>=0.000 |  |
| 177 -> 181                 | 0.15408   |           |          |              |  |
| 179 -> 181                 | -0.12828  |           |          |              |  |
| 180 -> 183                 | 0.67024   |           |          |              |  |
| Excited State 5: Singlet-A | 3.9572 eV | 313.31 nm | f=0.0571 | <S**2>=0.000 |  |
| 178 -> 181                 | 0.54848   |           |          |              |  |
| 180 -> 184                 | -0.43886  |           |          |              |  |
| Excited State 6: Singlet-A | 4.0675 eV | 304.82 nm | f=0.0033 | <S**2>=0.000 |  |
| 177 -> 181                 | 0.66459   |           |          |              |  |
| 178 -> 182                 | -0.11342  |           |          |              |  |
| 180 -> 183                 | -0.16642  |           |          |              |  |
| Excited State 7: Singlet-A | 4.1495 eV | 298.79 nm | f=0.7066 | <S**2>=0.000 |  |
| 178 -> 181                 | 0.41633   |           |          |              |  |
| 179 -> 182                 | 0.17062   |           |          |              |  |
| 180 -> 184                 | 0.53210   |           |          |              |  |
| Excited State 8: Singlet-A | 4.3904 eV | 282.40 nm | f=0.0000 | <S**2>=0.000 |  |

|                             |           |           |          |              |
|-----------------------------|-----------|-----------|----------|--------------|
| 178 -> 182                  | 0.21269   |           |          |              |
| 180 -> 185                  | 0.65281   |           |          |              |
| Excited State 9: Singlet-A  | 4.4155 eV | 280.80 nm | f=0.3444 | <S**2>=0.000 |
| 176 -> 181                  | -0.33714  |           |          |              |
| 178 -> 184                  | 0.11590   |           |          |              |
| 179 -> 182                  | 0.55594   |           |          |              |
| 180 -> 187                  | -0.14993  |           |          |              |
| Excited State 10: Singlet-A | 4.5752 eV | 270.99 nm | f=0.0009 | <S**2>=0.000 |
| 175 -> 181                  | 0.50193   |           |          |              |
| 178 -> 182                  | 0.23166   |           |          |              |
| 180 -> 185                  | -0.12793  |           |          |              |
| 180 -> 186                  | 0.40185   |           |          |              |

180: HOMO, 181: LUMO

**Cartesian coordinates for theoretically optimized structures of 6, 6<sup>+</sup>, 6<sup>2+</sup>, 7 and 1.**

**6**

|   |             |             |             |
|---|-------------|-------------|-------------|
| C | 2.29296562  | 1.47181634  | -0.39889590 |
| C | 1.08911317  | 0.82988030  | -0.73192603 |
| C | -0.16783310 | 1.41053833  | -0.75106486 |
| C | -0.27772280 | 2.76291682  | -0.50845088 |
| C | 0.92096700  | 3.47873057  | -0.26981217 |
| C | 2.19831753  | 2.89333908  | -0.20381351 |
| C | -3.00507039 | 2.12838736  | -0.28509454 |
| C | -2.53888138 | 0.83631955  | -0.50527371 |
| C | -3.26450419 | -0.35322449 | -0.25192562 |
| C | -4.61487864 | -0.17720400 | 0.11999599  |
| C | -5.14940762 | 1.10405057  | 0.30127621  |
| C | -4.32461995 | 2.24756208  | 0.13034204  |
| H | 0.83059892  | 4.54454953  | -0.10697450 |
| H | -5.24549676 | -1.03708956 | 0.28698350  |
| H | -4.72819164 | 3.23445661  | 0.33058099  |
| C | -1.08911907 | -0.82989446 | -0.73191568 |
| C | 0.16782839  | -1.41055327 | -0.75104413 |
| C | -2.29296884 | -1.47182800 | -0.39887353 |
| C | 0.27772449  | -2.76292622 | -0.50841253 |
| C | -2.19831990 | -2.89335304 | -0.20378599 |
| C | 2.53887893  | -0.83632946 | -0.50526785 |
| C | -0.92096377 | -3.47873920 | -0.26977015 |
| C | 3.26450441  | 0.35321952  | -0.25194864 |
| C | 3.00507944  | -2.12839054 | -0.28509093 |
| H | -0.83058982 | -4.54455782 | -0.10694681 |

---

|   |             |             |             |
|---|-------------|-------------|-------------|
| C | 4.61488792  | 0.17721302  | 0.11993119  |
| C | 4.32463835  | -2.24755567 | 0.13032391  |
| C | 5.14942325  | -1.10403954 | 0.30123511  |
| H | 5.24551531  | 1.03710763  | 0.28684823  |
| H | 4.72822134  | -3.23445080 | 0.33053739  |
| N | -1.25109174 | 0.53501076  | -0.88084095 |
| N | 1.25108436  | -0.53502608 | -0.88081649 |
| S | -1.90526332 | 3.54730134  | -0.52957168 |
| S | 1.90526922  | -3.54730931 | -0.52954212 |
| C | 6.62051973  | -1.32406227 | 0.71399700  |
| C | 7.33583408  | -2.17392538 | -0.36344441 |
| H | 8.38173185  | -2.34296998 | -0.08358657 |
| H | 6.86465227  | -3.15269918 | -0.49199058 |
| H | 7.32110998  | -1.66744607 | -1.33394556 |
| C | 7.39501541  | -0.00105157 | 0.86502973  |
| H | 7.41915991  | 0.56712370  | -0.07051928 |
| H | 6.96686497  | 0.63753797  | 1.64453799  |
| H | 8.43084759  | -0.21365524 | 1.14779662  |
| C | 6.67514072  | -2.06507576 | 2.07152152  |
| H | 7.71549716  | -2.22910126 | 2.37400566  |
| H | 6.18107221  | -1.48165067 | 2.85514984  |
| H | 6.18663265  | -3.04271271 | 2.02630271  |
| C | -3.43117695 | -3.76533058 | 0.10049518  |
| C | -3.99258284 | -3.38773553 | 1.49363549  |
| H | -4.20919269 | -2.32264796 | 1.58719527  |
| H | -4.91632848 | -3.94199437 | 1.69547459  |
| H | -3.26864472 | -3.64287603 | 2.27431706  |
| C | -4.49344342 | -3.56023465 | -1.00630320 |
| H | -5.40559545 | -4.11745839 | -0.76519325 |
| H | -4.76404769 | -2.51285797 | -1.14578225 |
| H | -4.11736621 | -3.92968251 | -1.96601734 |
| C | -3.10836122 | -5.27332066 | 0.13576528  |
| H | -2.68850943 | -5.62467827 | -0.81217814 |
| H | -2.41163527 | -5.52974313 | 0.93997228  |
| H | -4.03129357 | -5.83364153 | 0.31610800  |
| C | -6.62050751 | 1.32410303  | 0.71400726  |
| C | -7.33588784 | 2.17347928  | -0.36378417 |
| H | -6.86474811 | 3.15222037  | -0.49272506 |
| H | -7.32111893 | 1.66660046  | -1.33407588 |
| H | -8.38180149 | 2.34257415  | -0.08401263 |
| C | -6.67519925 | 2.06565195  | 2.07123038  |
| H | -7.71557670 | 2.22969561  | 2.37363092  |
| H | -6.18108613 | 1.48258388  | 2.85509642  |
| H | -6.18679606 | 3.04332554  | 2.02564492  |

---

|   |             |             |             |
|---|-------------|-------------|-------------|
| C | -7.39488481 | 0.00108786  | 0.86559872  |
| H | -7.41903423 | -0.56747001 | -0.06971900 |
| H | -6.96663558 | -0.63714735 | 1.64534131  |
| H | -8.43072419 | 0.21371655  | 1.14831973  |
| C | 3.43117143  | 3.76529944  | 0.10051143  |
| C | 4.49347175  | 3.56020203  | -1.00626072 |
| H | 4.11742760  | 3.92965933  | -1.96598305 |
| H | 5.40562593  | 4.11741218  | -0.76512384 |
| H | 4.76406604  | 2.51282051  | -1.14574013 |
| C | 3.99252196  | 3.38770046  | 1.49367410  |
| H | 4.91627451  | 3.94193424  | 1.69555346  |
| H | 3.26856299  | 3.64285661  | 2.27433084  |
| H | 4.20909842  | 2.32260637  | 1.58724331  |
| C | 3.10833869  | 5.27328325  | 0.13576668  |
| H | 2.68853570  | 5.62462974  | -0.81220175 |
| H | 2.41156420  | 5.52970741  | 0.93993166  |
| H | 4.03125813  | 5.83360808  | 0.31616735  |

unsubstituted 6

|   |             |             |             |
|---|-------------|-------------|-------------|
| C | -1.41138428 | -2.28932263 | -0.09819582 |
| C | -0.61741820 | -1.20474903 | -0.49218549 |
| C | 0.76722906  | -1.20388236 | -0.50263456 |
| C | 1.45166505  | -2.37192796 | -0.20433896 |
| C | 0.68089498  | -3.52276782 | 0.09727038  |
| C | -0.71789496 | -3.49354202 | 0.15961748  |
| C | 3.62184925  | -0.61740391 | 0.06071750  |
| C | 2.64965864  | 0.34046400  | -0.20678097 |
| C | 2.75885044  | 1.72466169  | 0.08369864  |
| C | 4.00439637  | 2.17845267  | 0.54562082  |
| C | 5.01915654  | 1.24479987  | 0.75926475  |
| C | 4.83330053  | -0.13945659 | 0.55896362  |
| H | 1.19536736  | -4.45144733 | 0.32270416  |
| H | 4.17393605  | 3.22822130  | 0.76282209  |
| H | 5.63425638  | -0.82942848 | 0.80498878  |
| C | 0.61742091  | 1.20475491  | -0.49216688 |
| C | -0.76722627 | 1.20388837  | -0.50262418 |
| C | 1.41138479  | 2.28932383  | -0.09815976 |
| C | -1.45166397 | 2.37193036  | -0.20431855 |
| C | 0.71789392  | 3.49354008  | 0.15966413  |
| C | -2.64965757 | -0.34046155 | -0.20680068 |
| C | -0.68089566 | 3.52276657  | 0.09730931  |
| C | -2.75885091 | -1.72466259 | 0.08366196  |
| C | -3.62184955 | 0.61740320  | 0.06070417  |
| H | -1.19536942 | 4.45144332  | 0.32275128  |

---

|   |             |             |             |
|---|-------------|-------------|-------------|
| C | -4.00439924 | -2.17845912 | 0.54557226  |
| C | -4.83330343 | 0.13944996  | 0.55893826  |
| C | -5.01916054 | -1.24480890 | 0.75922194  |
| H | -4.17394003 | -3.22823041 | 0.76275985  |
| H | -5.63426056 | 0.82941892  | 0.80496748  |
| N | 1.37377392  | 0.05113004  | -0.65330194 |
| N | -1.37377036 | -0.05112216 | -0.65331153 |
| S | 3.26004126  | -2.36929795 | -0.21604597 |
| S | -3.26004008 | 2.36930046  | -0.21603648 |
| H | -1.24935367 | -4.39504256 | 0.44645539  |
| H | -5.98175887 | -1.58635761 | 1.12674036  |
| H | 1.24935092  | 4.39503724  | 0.44651579  |
| H | 5.98175289  | 1.58634427  | 1.12679231  |

---

**6<sup>+</sup>**

---

|   |             |             |             |
|---|-------------|-------------|-------------|
| C | -2.32202500 | -1.48911200 | -0.00011800 |
| C | -1.08522900 | -0.83269300 | -0.00015800 |
| C | 0.17369600  | -1.40480800 | -0.00018500 |
| C | 0.28680200  | -2.79222400 | -0.00017400 |
| C | -0.92779200 | -3.50605700 | -0.00015200 |
| C | -2.22576400 | -2.91833200 | -0.00012800 |
| C | 3.04374000  | -2.13534900 | -0.00012200 |
| C | 2.55827800  | -0.83207100 | -0.00014300 |
| C | 3.31653600  | 0.36645000  | -0.00006300 |
| C | 4.70911000  | 0.18339900  | 0.00001000  |
| C | 5.26556100  | -1.11117500 | 0.00001300  |
| C | 4.42892000  | -2.25838100 | -0.00004400 |
| H | -0.86651900 | -4.58589700 | -0.00014600 |
| H | 5.37102500  | 1.03587400  | 0.00007000  |
| H | 4.87895500  | -3.24457900 | -0.00002000 |
| C | 1.08523400  | 0.83269100  | -0.00011500 |
| C | -0.17369200 | 1.40480600  | -0.00010300 |
| C | 2.32203000  | 1.48911000  | -0.00004500 |
| C | -0.28679900 | 2.79222100  | -0.00001000 |
| C | 2.22576600  | 2.91833000  | 0.00002600  |
| C | -2.55827500 | 0.83206900  | -0.00008200 |
| C | 0.92779500  | 3.50605500  | 0.00004500  |
| C | -3.31653200 | -0.36645300 | -0.00006800 |
| C | -3.04373700 | 2.13534600  | 0.00001800  |
| H | 0.86652300  | 4.58589600  | 0.00011500  |
| C | -4.70910600 | -0.18340400 | 0.00002200  |
| C | -4.42891800 | 2.25837700  | 0.00011100  |
| C | -5.26555800 | 1.11117000  | 0.00010400  |
| H | -5.37102000 | -1.03588000 | 0.00003500  |

---

---

|   |             |             |             |
|---|-------------|-------------|-------------|
| H | -4.87895300 | 3.24457400  | 0.00019600  |
| N | 1.22737600  | -0.53133800 | -0.00018700 |
| N | -1.22737100 | 0.53133600  | -0.00015100 |
| S | 1.91442900  | -3.55026500 | -0.00019100 |
| S | -1.91442700 | 3.55026300  | 0.00002600  |
| C | -6.79282500 | 1.33249800  | 0.00020900  |
| C | -7.19388500 | 2.13045700  | -1.26468700 |
| H | -8.27628200 | 2.29220000  | -1.27535100 |
| H | -6.71526800 | 3.11324500  | -1.30428500 |
| H | -6.92390600 | 1.58774600  | -2.17608700 |
| C | -7.57999300 | 0.00832800  | 0.00021500  |
| H | -7.37102900 | -0.59530300 | -0.88909300 |
| H | -7.37090300 | -0.59536800 | 0.88945000  |
| H | -8.65168400 | 0.22524100  | 0.00029900  |
| C | -7.19372500 | 2.13037400  | 1.26520600  |
| H | -8.27612000 | 2.29212200  | 1.27601500  |
| H | -6.92363500 | 1.58760200  | 2.17653600  |
| H | -6.71510000 | 3.11315800  | 1.30481100  |
| C | 3.47165100  | 3.82065400  | 0.00009900  |
| C | 4.29906500  | 3.53347500  | 1.27791600  |
| H | 4.56873700  | 2.48124400  | 1.38327800  |
| H | 5.22380300  | 4.11863000  | 1.26049400  |
| H | 3.73737900  | 3.82024600  | 2.17235600  |
| C | 4.29916900  | 3.53354200  | -1.27766500 |
| H | 5.22391000  | 4.11868800  | -1.26013300 |
| H | 4.56884000  | 2.48131500  | -1.38306600 |
| H | 3.73755900  | 3.82036900  | -2.17213500 |
| C | 3.13347700  | 5.32489300  | 0.00012400  |
| H | 2.57070500  | 5.62398600  | -0.88979900 |
| H | 2.57060100  | 5.62393300  | 0.88999900  |
| H | 4.06490400  | 5.89770000  | 0.00019500  |
| C | 6.79282800  | -1.33250400 | 0.00009600  |
| C | 7.19387500  | -2.13041800 | -1.26483200 |
| H | 6.71525500  | -3.11320300 | -1.30446200 |
| H | 6.92389000  | -1.58767400 | -2.17621000 |
| H | 8.27627100  | -2.29216500 | -1.27551000 |
| C | 7.19374000  | -2.13042600 | 1.26506100  |
| H | 8.27613500  | -2.29217200 | 1.27585500  |
| H | 6.92365600  | -1.58768700 | 2.17641300  |
| H | 6.71511700  | -3.11321200 | 1.30463500  |
| C | 7.57999700  | -0.00833500 | 0.00014300  |
| H | 7.37103300  | 0.59532400  | -0.88914700 |
| H | 7.37090600  | 0.59533500  | 0.88939500  |
| H | 8.65168700  | -0.22524800 | 0.00022000  |

---

|   |             |             |             |
|---|-------------|-------------|-------------|
| C | -3.47165700 | -3.82064500 | -0.00010100 |
| C | -4.29916900 | -3.53345800 | -1.27785200 |
| H | -3.73756100 | -3.82024400 | -2.17233600 |
| H | -5.22391700 | -4.11859400 | -1.26035100 |
| H | -4.56882800 | -2.48122200 | -1.38319600 |
| C | -4.29907300 | -3.53351300 | 1.27772500  |
| H | -5.22381600 | -4.11865900 | 1.26027500  |
| H | -3.73739200 | -3.82032400 | 2.17215500  |
| H | -4.56873700 | -2.48128400 | 1.38312800  |
| C | -3.13350900 | -5.32489200 | -0.00014700 |
| H | -2.57074800 | -5.62395500 | -0.89008700 |
| H | -2.57063500 | -5.62398300 | 0.88971100  |
| H | -4.06494600 | -5.89768100 | -0.00009900 |

unsubstituted 6<sup>+</sup>

|   |             |             |             |
|---|-------------|-------------|-------------|
| C | -0.34129100 | 4.67718400  | 0.16605700  |
| C | -0.02644000 | 3.32304500  | 0.01187800  |
| C | -1.13838500 | 2.44019600  | -0.07183200 |
| C | -2.48773400 | 2.76196700  | 0.02696900  |
| C | -2.75931300 | 4.12361500  | 0.18664100  |
| C | -1.69368000 | 5.04394100  | 0.24224200  |
| C | -2.81607500 | -0.05142300 | -0.06379300 |
| C | -1.42417100 | 0.00281100  | -0.17927700 |
| C | -0.68633900 | -1.16709000 | -0.18512700 |
| C | -1.18497300 | -2.46603800 | -0.05485200 |
| C | -2.59071500 | -2.52622900 | 0.03940300  |
| C | -3.37302100 | -1.34590900 | 0.03019500  |
| H | 0.42953500  | 5.43674000  | 0.23510100  |
| H | -3.77958500 | 4.48134600  | 0.27495900  |
| H | -1.93856600 | 6.09386800  | 0.36361500  |
| H | -3.10654300 | -3.47502700 | 0.14124700  |
| H | -4.44920100 | -1.45050600 | 0.11909200  |
| C | 0.68633900  | 1.16709000  | -0.18512700 |
| C | 1.42417100  | -0.00281100 | -0.17927700 |
| C | 1.18497300  | 2.46603800  | -0.05485200 |
| C | 2.81607500  | 0.05142300  | -0.06379300 |
| C | 2.59071500  | 2.52622900  | 0.03940300  |
| C | 1.13838500  | -2.44019600 | -0.07183200 |
| C | 3.37302100  | 1.34590900  | 0.03019500  |
| H | 3.10654300  | 3.47502700  | 0.14124700  |
| C | 0.02644000  | -3.32304500 | 0.01187800  |
| C | 2.48773400  | -2.76196700 | 0.02696900  |
| H | 4.44920100  | 1.45050600  | 0.11909200  |
| C | 0.34129100  | -4.67718400 | 0.16605700  |



|   |             |             |             |
|---|-------------|-------------|-------------|
| C | 2.75931300  | -4.12361500 | 0.18664100  |
| C | 1.69368000  | -5.04394100 | 0.24224200  |
| H | -0.42953500 | -5.43674000 | 0.23510100  |
| H | 3.77958500  | -4.48134600 | 0.27495900  |
| H | 1.93856600  | -6.09386800 | 0.36361500  |
| N | -0.68633900 | 1.15581300  | -0.21044000 |
| N | 0.68633900  | -1.15581300 | -0.21044000 |
| S | -3.75937500 | 1.47703300  | -0.03449800 |
| S | 3.75937500  | -1.47703300 | -0.03449800 |

6<sup>2+</sup>

|   |             |             |             |
|---|-------------|-------------|-------------|
| C | -2.31325100 | -1.49475100 | -0.00374100 |
| C | -1.08046900 | -0.83299900 | -0.00636200 |
| C | 0.18658200  | -1.39426100 | -0.00606100 |
| C | 0.30777100  | -2.79808800 | -0.00348500 |
| C | -0.89943600 | -3.50509500 | -0.00179000 |
| C | -2.21312500 | -2.91894300 | -0.00177900 |
| C | 3.04533400  | -2.13748300 | -0.00181100 |
| C | 2.55772800  | -0.82896800 | -0.00385300 |
| C | 3.31450100  | 0.37482200  | -0.00249700 |
| C | 4.69912500  | 0.19551600  | 0.00025100  |
| C | 5.26271800  | -1.10817300 | 0.00187400  |
| C | 4.43120600  | -2.25809000 | 0.00105600  |
| H | -0.84423400 | -4.58543200 | 0.00005900  |
| H | 5.36463000  | 1.04496300  | 0.00138700  |
| H | 4.88636300  | -3.24148900 | 0.00289700  |
| C | 1.08043500  | 0.83301500  | -0.00646400 |
| C | -0.18662200 | 1.39428500  | -0.00605200 |
| C | 2.31327200  | 1.49471100  | -0.00388800 |
| C | -0.30781700 | 2.79809800  | -0.00345300 |
| C | 2.21300600  | 2.91894200  | -0.00187400 |
| C | -2.55776600 | 0.82896800  | -0.00370700 |
| C | 0.89938100  | 3.50514700  | -0.00181200 |
| C | -3.31455800 | -0.37484700 | -0.00240300 |
| C | -3.04529700 | 2.13752000  | -0.00166100 |
| H | 0.84418500  | 4.58548100  | 0.00009100  |
| C | -4.69917700 | -0.19540200 | 0.00019700  |
| C | -4.43116100 | 2.25820500  | 0.00121200  |
| C | -5.26269900 | 1.10833100  | 0.00194700  |
| H | -5.36483200 | -1.04471500 | 0.00110300  |
| H | -4.88627800 | 3.24162200  | 0.00310500  |
| N | 1.22964900  | -0.53301500 | -0.00644100 |
| N | -1.22967700 | 0.53300600  | -0.00633300 |
| S | 1.92739500  | -3.54145900 | -0.00250500 |

---

|   |             |             |             |
|---|-------------|-------------|-------------|
| S | -1.92737700 | 3.54149400  | -0.00235200 |
| C | -6.78694100 | 1.31875300  | 0.00532700  |
| C | -7.18753900 | 2.12113500  | -1.26015000 |
| H | -8.27060200 | 2.27211300  | -1.26491400 |
| H | -6.72080000 | 3.10964800  | -1.29464200 |
| H | -6.91802000 | 1.58428100  | -2.17474800 |
| C | -7.56732600 | -0.00939200 | 0.00498500  |
| H | -7.36297700 | -0.61039700 | -0.88728400 |
| H | -7.35980300 | -0.61269600 | 0.89496900  |
| H | -8.63846900 | 0.20590700  | 0.00720500  |
| C | -7.18215600 | 2.11731400  | 1.27492400  |
| H | -8.26514200 | 2.26861800  | 1.28460000  |
| H | -6.90903700 | 1.57749900  | 2.18670800  |
| H | -6.71489900 | 3.10554500  | 1.31056400  |
| C | 3.44384700  | 3.83534100  | 0.00055000  |
| C | 4.27025700  | 3.55028600  | 1.28242400  |
| H | 4.55566600  | 2.50206800  | 1.38746500  |
| H | 5.18618100  | 4.14738400  | 1.26187900  |
| H | 3.70781500  | 3.83197500  | 2.17740600  |
| C | 4.27357000  | 3.55251200  | -1.27966700 |
| H | 5.18955800  | 4.14938800  | -1.25564800 |
| H | 4.55906000  | 2.50443600  | -1.38595000 |
| H | 3.71352300  | 3.83596800  | -2.17559500 |
| C | 3.08962200  | 5.33619000  | 0.00133300  |
| H | 2.52957500  | 5.63420700  | -0.89063300 |
| H | 2.52788600  | 5.63293700  | 0.89266100  |
| H | 4.01645800  | 5.91491900  | 0.00264700  |
| C | 6.78696900  | -1.31852400 | 0.00516200  |
| C | 7.18751000  | -2.12100500 | -1.26027100 |
| H | 6.72086600  | -3.10956600 | -1.29461400 |
| H | 6.91785000  | -1.58427500 | -2.17490100 |
| H | 8.27058600  | -2.27188000 | -1.26512900 |
| C | 7.18232800  | -2.11694000 | 1.27480100  |
| H | 8.26532100  | -2.26820300 | 1.28439800  |
| H | 6.90926500  | -1.57704600 | 2.18655300  |
| H | 6.71510800  | -3.10518400 | 1.31057300  |
| C | 7.56728200  | 0.00966400  | 0.00461600  |
| H | 7.36278300  | 0.61059000  | -0.88767300 |
| H | 7.35985000  | 0.61302300  | 0.89458400  |
| H | 8.63843800  | -0.20557500 | 0.00671200  |
| C | -3.44389300 | -3.83548400 | 0.00042800  |
| C | -4.27334800 | -3.55296700 | -1.28002200 |
| H | -3.71299000 | -3.83639300 | -2.17577000 |
| H | -5.18920300 | -4.15005200 | -1.25620200 |

---

|   |             |             |             |
|---|-------------|-------------|-------------|
| H | -4.55904300 | -2.50497400 | -1.38653200 |
| C | -4.27072000 | -3.55089100 | 1.28210300  |
| H | -5.18632400 | -4.14846200 | 1.26129800  |
| H | -3.70835000 | -3.83233500 | 2.17720800  |
| H | -4.55672700 | -2.50285700 | 1.38716000  |
| C | -3.08925700 | -5.33630100 | 0.00124000  |
| H | -2.52843900 | -5.63410000 | -0.89029300 |
| H | -2.52822600 | -5.63315600 | 0.89295400  |
| H | -4.01599700 | -5.91519500 | 0.00169900  |

unsubstituted  $6^{2+}$

|   |             |             |             |
|---|-------------|-------------|-------------|
| C | 2.14423400  | 4.18005300  | -0.00016100 |
| C | 1.71176800  | 2.85683700  | 0.00005500  |
| C | 0.29701800  | 2.67783000  | 0.00015600  |
| C | -0.69698900 | 3.65867300  | 0.00000200  |
| C | -0.21840500 | 4.97579900  | -0.00015000 |
| C | 1.16874500  | 5.20282900  | -0.00022800 |
| C | -2.43498700 | 1.44088800  | 0.00004400  |
| C | -1.20198400 | 0.74994000  | 0.00012000  |
| C | -1.18897800 | -0.63704300 | 0.00000600  |
| C | -2.29685000 | -1.48664200 | 0.00001900  |
| C | -3.52431600 | -0.80172400 | 0.00001000  |
| C | -3.57864000 | 0.62358300  | 0.00000600  |
| H | 3.19621300  | 4.44258900  | -0.00024100 |
| H | -0.89925300 | 5.82028600  | -0.00021700 |
| H | 1.50974600  | 6.23303900  | -0.00040600 |
| H | -4.46829700 | -1.33690200 | 0.00007100  |
| H | -4.56041600 | 1.08589800  | -0.00001400 |
| C | 1.18897800  | 0.63704300  | 0.00000600  |
| C | 1.20198400  | -0.74994000 | 0.00012000  |
| C | 2.29685000  | 1.48664200  | 0.00001900  |
| C | 2.43498700  | -1.44088800 | 0.00004400  |
| C | 3.52431600  | 0.80172400  | 0.00001000  |
| C | -0.29701800 | -2.67783000 | 0.00015600  |
| C | 3.57864000  | -0.62358300 | 0.00000600  |
| H | 4.46829700  | 1.33690200  | 0.00007100  |
| C | -1.71176800 | -2.85683700 | 0.00005500  |
| C | 0.69698900  | -3.65867300 | 0.00000200  |
| H | 4.56041600  | -1.08589800 | -0.00001400 |
| C | -2.14423400 | -4.18005300 | -0.00016100 |
| C | 0.21840500  | -4.97579900 | -0.00015000 |
| C | -1.16874500 | -5.20282900 | -0.00022800 |
| H | -3.19621300 | -4.44258900 | -0.00024100 |
| H | 0.89925300  | -5.82028600 | -0.00021700 |

|   |             |             |             |
|---|-------------|-------------|-------------|
| H | -1.50974600 | -6.23303900 | -0.00040600 |
| N | 0.01238400  | 1.34351200  | 0.00011400  |
| N | -0.01238400 | -1.34351200 | 0.00011400  |
| S | -2.43498700 | 3.22387600  | 0.00004500  |
| S | 2.43498700  | -3.22387600 | 0.00004500  |

7

|   |             |             |             |
|---|-------------|-------------|-------------|
| C | -2.12741800 | -1.68496700 | -0.39241700 |
| C | -1.00299500 | -0.93386600 | -0.76328300 |
| C | 0.30695900  | -1.38680500 | -0.78901400 |
| C | 0.53574600  | -2.72205500 | -0.51404500 |
| C | -0.57643600 | -3.55121300 | -0.24158500 |
| C | -1.89998800 | -3.09002200 | -0.16637700 |
| C | 3.18006700  | -1.82811100 | -0.26296400 |
| C | 2.59716800  | -0.59188000 | -0.51560000 |
| C | 3.19857200  | 0.66102700  | -0.22831900 |
| C | 4.53161300  | 0.60303400  | 0.21563800  |
| C | 5.18011400  | -0.62504100 | 0.43754500  |
| C | 4.48043400  | -1.83562100 | 0.22605500  |
| H | -0.36737600 | -4.59529000 | -0.05266800 |
| H | 5.06906800  | 1.51641000  | 0.42099900  |
| H | 4.94692000  | -2.78759100 | 0.45327600  |
| C | 1.00302100  | 0.93388500  | -0.76337100 |
| C | -0.30693500 | 1.38682100  | -0.78898300 |
| C | 2.12744900  | 1.68497900  | -0.39249100 |
| C | -0.53572000 | 2.72206800  | -0.51400100 |
| C | 1.90003200  | 3.09003900  | -0.16645800 |
| C | -2.59713800 | 0.59189300  | -0.51546900 |
| C | 0.57647300  | 3.55122900  | -0.24161100 |
| C | -3.19854700 | -0.66103100 | -0.22823400 |
| C | -3.18005400 | 1.82812300  | -0.26288100 |
| H | 0.36743500  | 4.59531100  | -0.05269100 |
| C | -4.53161800 | -0.60303900 | 0.21562200  |
| C | -4.48047000 | 1.83562300  | 0.22602300  |
| C | -5.18014500 | 0.62503300  | 0.43748000  |
| H | -5.06910000 | -1.51640700 | 0.42094900  |
| H | -4.94699700 | 2.78758300  | 0.45318100  |
| N | 1.29619600  | -0.41479200 | -0.90376800 |
| N | -1.29617100 | 0.41480700  | -0.90362700 |
| C | -6.63877300 | 0.69977900  | 0.93661800  |
| C | -7.49061200 | 1.48350800  | -0.09057100 |
| H | -8.52927300 | 1.54940100  | 0.25107500  |
| H | -7.12391900 | 2.50392200  | -0.23379300 |
| H | -7.48454000 | 0.98691200  | -1.06615400 |

---

|   |             |             |             |
|---|-------------|-------------|-------------|
| C | -7.27145300 | -0.69292600 | 1.11728700  |
| H | -7.29507200 | -1.25737300 | 0.17925500  |
| H | -6.74326400 | -1.29076000 | 1.86746900  |
| H | -8.30517600 | -0.58164500 | 1.45831100  |
| C | -6.68046100 | 1.42714200  | 2.30187900  |
| H | -7.71211800 | 1.49112800  | 2.66443600  |
| H | -6.08988800 | 0.88993400  | 3.05100700  |
| H | -6.28995700 | 2.44675000  | 2.23729200  |
| C | 3.03832500  | 4.06822500  | 0.17854700  |
| C | 3.58681200  | 3.73635100  | 1.58856800  |
| H | 3.89571100  | 2.69486200  | 1.69050600  |
| H | 4.45026100  | 4.37041900  | 1.81832700  |
| H | 2.81979900  | 3.92381900  | 2.34663000  |
| C | 4.14761700  | 3.97033700  | -0.89615000 |
| H | 4.99376300  | 4.61038200  | -0.62407100 |
| H | 4.52345300  | 2.95533200  | -1.03237200 |
| H | 3.76827100  | 4.30909500  | -1.86556400 |
| C | 2.57091900  | 5.53821500  | 0.20677500  |
| H | 2.14335000  | 5.85033800  | -0.75114600 |
| H | 1.83359100  | 5.72549700  | 0.99329900  |
| H | 3.43148800  | 6.18286800  | 0.41058500  |
| C | 6.63868900  | -0.69984500 | 0.93678600  |
| C | 7.49062300  | -1.48324900 | -0.09059300 |
| H | 7.12389800  | -2.50359800 | -0.23419400 |
| H | 7.48465300  | -0.98631200 | -1.06599900 |
| H | 8.52924700  | -1.54927900 | 0.25113900  |
| C | 6.68029300  | -1.42762600 | 2.30181700  |
| H | 7.71191800  | -1.49171500 | 2.66444600  |
| H | 6.08965300  | -0.89066600 | 3.05107100  |
| H | 6.28979800  | -2.44722100 | 2.23690600  |
| C | 7.27129700  | 0.69283100  | 1.11792800  |
| H | 7.29522300  | 1.25745500  | 0.18000900  |
| H | 6.74285500  | 1.29051900  | 1.86804500  |
| H | 8.30491100  | 0.58148800  | 1.45926200  |
| C | -3.03827600 | -4.06820500 | 0.17865900  |
| C | -4.14753600 | -3.97039800 | -0.89607400 |
| H | -3.76814800 | -4.30915500 | -1.86547100 |
| H | -4.99366500 | -4.61047400 | -0.62401200 |
| H | -4.52341300 | -2.95541300 | -1.03231700 |
| C | -3.58682600 | -3.73624800 | 1.58863700  |
| H | -4.45027200 | -4.37032100 | 1.81839300  |
| H | -2.81984300 | -3.92365800 | 2.34674500  |
| H | -3.89575000 | -2.69475700 | 1.69049000  |
| C | -2.57084900 | -5.53818000 | 0.20700700  |

---

|   |             |             |             |
|---|-------------|-------------|-------------|
| H | -2.14321500 | -5.85036500 | -0.75086700 |
| H | -1.83356100 | -5.72539300 | 0.99358500  |
| H | -3.43141500 | -6.18284200 | 0.41080500  |
| S | 2.23395100  | -3.33412000 | -0.60931300 |
| O | 2.49612400  | -3.72924200 | -2.00171300 |
| O | 2.46446500  | -4.30336400 | 0.47139500  |
| S | -2.23393000 | 3.33416000  | -0.60910400 |
| O | -2.46437000 | 4.30326300  | 0.47174900  |
| O | -2.49617800 | 3.72949000  | -2.00143000 |

unsubstituted 7

|   |             |             |             |
|---|-------------|-------------|-------------|
| C | -0.64786700 | 2.60042500  | 0.04990800  |
| C | -0.22395300 | 1.33704600  | 0.47318700  |
| C | 1.09676100  | 0.91490100  | 0.48659800  |
| C | 2.09105900  | 1.82902100  | 0.16078400  |
| C | 1.71278900  | 3.15226200  | -0.17075600 |
| C | 0.37221000  | 3.53979500  | -0.23769900 |
| C | 3.62778700  | -0.49402000 | -0.13028200 |
| C | 2.41917000  | -1.11325900 | 0.16726300  |
| C | 2.10177600  | -2.46303500 | -0.14703900 |
| C | 3.13585700  | -3.24391900 | -0.67426000 |
| C | 4.38037400  | -2.65179600 | -0.92597000 |
| C | 4.62738300  | -1.28804500 | -0.69277400 |
| H | 2.49152200  | 3.86489000  | -0.41975300 |
| H | 2.97453600  | -4.28739900 | -0.92593600 |
| H | 5.58094100  | -0.84719500 | -0.96270700 |
| C | 0.22394500  | -1.33705200 | 0.47317100  |
| C | -1.09677000 | -0.91490700 | 0.48656900  |
| C | 0.64786500  | -2.60042600 | 0.04988500  |
| C | -2.09106200 | -1.82902300 | 0.16072800  |
| C | -0.37220700 | -3.53979200 | -0.23775000 |
| C | -2.41917400 | 1.11325700  | 0.16724000  |
| C | -1.71278700 | -3.15226000 | -0.17082300 |
| C | -2.10177500 | 2.46303700  | -0.14704100 |
| C | -3.62778500 | 0.49402100  | -0.13033400 |
| H | -2.49151600 | -3.86488500 | -0.41984200 |
| C | -3.13584500 | 3.24392600  | -0.67427300 |
| C | -4.62737000 | 1.28805200  | -0.69283700 |
| C | -4.38035700 | 2.65180500  | -0.92601300 |
| H | -2.97451900 | 4.28740900  | -0.92593300 |
| H | -5.58092300 | 0.84720400  | -0.96279200 |
| N | 1.29540700  | -0.45901900 | 0.61584600  |
| N | -1.29541800 | 0.45901200  | 0.61583600  |

|   |             |             |             |
|---|-------------|-------------|-------------|
| S | 3.81224800  | 1.27130600  | 0.22949400  |
| O | 4.27465700  | 1.41007000  | 1.61764800  |
| O | 4.56844900  | 1.90500100  | -0.85842600 |
| S | -3.81225100 | -1.27130800 | 0.22942200  |
| O | -4.56843900 | -1.90499200 | -0.85851300 |
| O | -4.27467700 | -1.41008400 | 1.61756900  |
| H | 5.17465700  | -3.25801500 | -1.34864700 |
| H | 0.12869300  | 4.54937600  | -0.55059300 |
| H | -5.17463300 | 3.25803000  | -1.34869800 |
| H | -0.12868600 | -4.54937000 | -0.55065200 |

### 1

|   |             |             |             |
|---|-------------|-------------|-------------|
| C | 0.22586100  | 4.38914300  | -0.62505600 |
| C | -0.05136500 | 3.21677100  | 0.04157000  |
| C | 1.09209100  | 2.39902200  | 0.36571600  |
| C | 2.41207000  | 2.55855200  | -0.11435000 |
| C | 2.64464100  | 3.82492000  | -0.75181200 |
| C | 1.59032800  | 4.69337300  | -0.96332400 |
| C | 3.26407500  | 1.41215400  | -0.11700800 |
| C | 2.78321400  | 0.12641200  | 0.25702100  |
| C | 1.46261300  | 0.04886400  | 0.80463400  |
| C | 0.77220900  | -1.17572700 | 0.84836100  |
| C | 1.26691400  | -2.37089700 | 0.33315000  |
| C | 2.64464100  | -2.34451400 | -0.05919400 |
| C | 3.37086200  | -1.15598600 | -0.06891500 |
| H | -0.55545000 | 5.07246800  | -0.94747100 |
| H | 3.63577100  | 4.08365000  | -1.11518300 |
| H | 1.78539700  | 5.63353800  | -1.47122300 |
| H | 4.25821500  | 1.50066900  | -0.54962700 |
| H | 3.13167900  | -3.24467100 | -0.42531000 |
| H | 4.39538400  | -1.18238600 | -0.43114400 |
| C | -0.77220900 | 1.17572700  | 0.84836100  |
| C | -1.46261300 | -0.04886400 | 0.80463400  |
| C | -1.26691400 | 2.37089700  | 0.33315000  |
| C | -2.78321400 | -0.12641200 | 0.25702100  |
| C | -2.64464100 | 2.34451400  | -0.05919400 |
| C | -1.09209100 | -2.39902200 | 0.36571600  |
| C | -3.26407500 | -1.41215400 | -0.11700800 |
| C | -3.37086200 | 1.15598600  | -0.06891500 |
| H | -3.13167900 | 3.24467100  | -0.42531000 |
| C | 0.05136500  | -3.21677100 | 0.04157000  |
| C | -2.41207000 | -2.55855200 | -0.11435000 |
| H | -4.25821500 | -1.50066900 | -0.54962700 |
| H | -4.39538400 | 1.18238600  | -0.43114400 |

---

|   |             |             |             |
|---|-------------|-------------|-------------|
| C | -0.22586100 | -4.38914300 | -0.62505600 |
| C | -2.64464100 | -3.82492000 | -0.75181200 |
| C | -1.59032800 | -4.69337300 | -0.96332400 |
| H | 0.55545000  | -5.07246800 | -0.94747100 |
| H | -3.63577100 | -4.08365000 | -1.11518300 |
| H | -1.78539700 | -5.63353800 | -1.47122300 |
| C | -0.66597800 | -1.18635700 | 0.87253500  |
| C | 0.66597800  | 1.18635700  | 0.87253500  |

---



## 9. References

- [S1] K. Yamamoto, S. Higashibayashi, *Chem. Eur. J.* **2016**, *22*, 663-671.
- [S2] M. J. Frisch, G. W. Trucks, H. B. Schlegel, G. E. Scuseria, M. A. Robb, J. R. Cheeseman, G. Scalmani, V. Barone, G. A. Petersson, H. Nakatsuji, X. Li, M. Caricato, A. V. Marenich, J. Bloino, B. G. Janesko, R. Gomperts, B. Mennucci, H. P. Hratchian, J. V. Ortiz, A. F. Izmaylov, J. L. Sonnenberg, D. Williams-Young, F. Ding, F. Lipparini, F. Egidi, J. Goings, B. Peng, A. Petrone, T. Henderson, D. Ranasinghe, V. G. Zakrzewski, J. Gao, N. Rega, G. Zheng, W. Liang, M. Hada, M. Ehara, K. Toyota, R. Fukuda, J. Hasegawa, M. Ishida, T. Nakajima, Y. Honda, O. Kitao, H. Nakai, T. Vreven, K. Throssell, J. A. Montgomery, Jr., J. E. Peralta, F. Ogliaro, M. J. Bearpark, J. J. Heyd, E. N. Brothers, K. N. Kudin, V. N. Staroverov, T. A. Keith, R. Kobayashi, J. Normand, K. Raghavachari, A. P. Rendell, J. C. Burant, S. S. Iyengar, J. Tomasi, M. Cossi, J. M. Millam, M. Klene, C. Adamo, R. Cammi, J. W. Ochterski, R. L. Martin, K. Morokuma, O. Farkas, J. B. Foresman, and D. J. Fox, *Gaussian 16, Revision A.03*, Gaussian, Inc., Wallingford CT, **2016**.
- [S3] T. Amaya, H. Sakane, T. Nakata, T. Hirao, *Pure Appl. Chem.* **2010**, *82*, 969-978.
- [S4] T. Lu, F. Chen, *J. Comput. Chem.* **2012**, *33*, 580-592.
